## Sex-specific body mass ageing trajectories in adult Asian elephants

Lucas D. Lalande<sup>1,2,3,a</sup>, Virpi Lummaa<sup>1,a</sup>, Htoo H. Aung<sup>4</sup>, Win Htut<sup>4</sup>, U. Kyaw Nyein<sup>4</sup>,  
Vérane Berger<sup>1,a,\*</sup>, Michael Briga<sup>1,a,\*</sup>

<sup>1</sup> Department of Biology, University of Turku, Turku, Finland;

<sup>2</sup> Université Bourgogne Franche-Comté, Dijon, France;

<sup>3</sup> Present address: Université de Lyon, Université Lyon 1, UMR CNRS 5558, Villeurbanne CEDEX, France;

<sup>4</sup> Myanmar Timber Enterprise, Ministry of Natural Resources and Environmental Conservation, West Gyogone Forest Compound, Yangon, Myanmar;

\* Equal contribution of these authors

<sup>a</sup> Corresponding authors: L. D. Lalande: [lucas.lalande@univ-lyon1.fr](mailto:lucas.lalande@univ-lyon1.fr), V. Lummaa: [virpi.lummaa@gmail.com](mailto:virpi.lummaa@gmail.com), V. Berger: [verber@utu.fi](mailto:verber@utu.fi), M. Briga: [michbriga@gmail.com](mailto:michbriga@gmail.com)

In species with marked sexual dimorphism and where one sex undergoes stronger intrasexual competition, that sex is expected to age earlier or quicker. Here, we utilise a unique, longitudinal dataset of a semi-captive population of Asian elephants (*Elephas maximus*), a species with marked male-biased intrasexual competition, with males being larger and living shorter, and test the hypothesis that males show earlier and/or faster body mass ageing than females. We show sex-specific ageing trajectories: adult males gained weight up to the age of 48 years old, followed by a decrease in body mass until natural death. In contrast, adult females gained body mass with age until a body mass decline in the last year of life. Our study shows that sex-specific life-histories shape ageing patterns consistent with the predictions of the classical theory of ageing.

**Keywords: senescence, sex-differences, terminal decline, *Elephas maximus*, long-term data**

## 1 Introduction

2 Ageing – a decline in organismal functioning with age [1] – has been observed in  
3 many species [2]. However, the onset and rates of ageing differ both between [2] and  
4 within species [3] and between sexes [4]. A main challenge in ageing research is to  
5 quantify and explain differences in onset and rates of ageing [5].

6 In species with sex-specific intrasexual competition, classic theory predicts that the  
7 sex with the highest intrasexual competition has a shorter lifespan and an earlier  
8 onset and/or higher rate of ageing [6]. The rationale is that high intrasexual selection  
9 often results in one sex showing conspicuous displays or aggressive intrasexual  
10 behaviours, leading to increased mortality and a *live fast, die young* pace of life [6–8].  
11 Accordingly, in polygynous species with male-biased intrasexual competitions, males  
12 often die earlier [9] and age earlier or faster than females [4,8,10–12]. However,  
13 recent conceptual developments have shown that this association can be disrupted.  
14 This can occur for example because of condition-dependent extrinsic mortality  
15 selecting particularly high-performing individuals in the population [13] or canalisation  
16 (*i.e.* the more a trait contributes to fitness, the less it should deviate from optimal trait  
17 value, with respect to environmental variation [14]), thereby contradicting the  
18 theoretically expected earlier or faster ageing in males. The extent to which such  
19 phenomena occur in nature remains unknown.

20 Here, we used a unique long-term dataset to describe sex-specific body mass ageing  
21 trajectories in a nutritionally unsupplemented semi-captive timber population of Asian  
22 elephants (*Elephas maximus*) living in their natural environment in Myanmar. Body  
23 mass is of interest in the study of ageing because it is positively associated with key  
24 life-history traits such as reproduction and lifespan in many non-human species [15].  
25 Accordingly, in Asian elephants, seasonal variation in body mass was positively  
26 associated with survival the following month (*e.g.* low body mass was associated with  
27 low survival during dry season) [16].

28 However, we know almost nothing about how body mass changes with age in  
29 elephants despite the interest in studying ageing in such a long-lived, social and  
30 sexually dimorphic non-human species. While females live in kin groups, adult males  
31 often roam solitary, undergo a more intense intrasexual competition for dominance

32 and mating [17] and hence are bigger, heavier [18], and shorter-lived than females  
33 (respective median lifespans: 30.8 and 44.7 years) [19]. Based on this male-biased  
34 intrasexual competition and shorter lifespan, and following the classic theory of  
35 ageing, we expected males to display earlier and/or faster body mass ageing than  
36 females [6,7].

## 37 **Material and methods**

### 38 **Study population**

39 We studied the world's largest semi-captive Asian elephant population, including  
40 around 3,000 individually-marked elephants owned by the government-run Myanma  
41 Timber Enterprise (MTE) [20]. These elephants are distributed across Myanmar in  
42 forest camps and used as riding, transport and drafting animals. Males and females  
43 follow the same government set limitations on workload, except during pregnancy  
44 and early motherhood, and on taming and retirement (details in S11). Their birth,  
45 death, pedigree details, and morphological measurements have been recorded for  
46 almost a century by local veterinarians. Elephants work during the day and socialise,  
47 mate and forage freely in forests at night [21,22]. Consequently, their access to  
48 resources, reproduction, and social behaviour resemble that of wild elephants.

### 49 **Data collection and selection**

50 We extracted 1,901 body masses of 347 elephants with known sex, year of birth  
51 ('YOB'), alive or dead status, origin (captive-born or wild-caught) and measurement  
52 season (hot: Feb-May, monsoon: Jun-Sep, cold: Oct-Jan [16]) from 325 working  
53 localities ('township') monitored on average every 1.5 years between 1968-2018.  
54 When body mass measurements were not available, we estimated body masses  
55 using height to the shoulder and chest girth (n=1,985 measurements on 342  
56 individuals, method in S11). In Asian elephants, chest girth reflects changes in mass  
57 in addition to the fixed effect of structural size during adulthood (details in S12). In  
58 total, we obtained a median of 4.0 measurements/individual [2.5-97.5<sup>th</sup> percentiles:  
59 1.0-36.4], followed for a median period of 2.8 years [2.5-97.5<sup>th</sup>: 0.0-36.6] on 493  
60 elephants (n=3,886).

61 Our analyses focused on age- and sex-specific variation in adult body mass from age  
62 18 onwards, omitting the phase of height growth [18]. Study elephants were aged 18-  
63 72 years (mean=39.3) and born 1941-1999. Age and cohort information were  
64 comparable between sexes, with 171 males (n=1,316) born 1954-1999 and aged 18-  
65 64 years (mean=37.4), and 322 females (n=2,570) born 1941-1999 and aged 18-72  
66 years (mean=40.2). Two influential observations measured at age 18 and 23 were  
67 removed for one male because of particularly low  $\Delta$ age (Cook's distance=0.61 and  
68 0.25, mean of 0.001 on all males). Other observations for this male, all after age 50,  
69 were included.

## 70 **Statistical analyses**

71 We investigated the age- and sex-specific variation in body mass in R version 4.0.3  
72 [23], using the log-transformed body mass as a dependent variable with a normal  
73 error distribution. We first tested whether there were sex-specific ageing trajectories  
74 (table S2) and then compared the sex-specific ageing trajectories using linear mixed  
75 models with the function 'lmer' (package 'lme4' [24]) and identified best-fitting models  
76 using model selection with the function 'dredge' (package 'MuMIn' [25]). The retained  
77 model had the lowest AICc and all models leading to other conclusions worsened  
78 model fit with  $>4\Delta$ AICc (see S13). Visual inspection of model residuals confirmed that  
79 these fulfilled all assumptions of distribution and homogeneity without any influential  
80 data points or outliers.

### 81 *Within- vs. between-individual change*

82 In all models, we accounted for non-independence of data due to repeated  
83 measurements from the same individual by including elephant identity ('ID') as a  
84 random intercept. Here we are interested in within-individual changes in body mass.  
85 Because population composition can change with age (e.g. selective disappearance),  
86 body mass changes at the population level can result from both between-individual  
87 and within-individual changes. To capture the within-individual trajectory, we followed  
88 the approach developed in [26] and decomposed the age variable in the models into  
89 *i*) a term 'age-at-last-measurement' (henceforth 'age-last') capturing the between-  
90 individual changes with age and *ii*) a ' $\Delta$ age' term (age at measurement minus the  
91 individual's mean age for all measurements) capturing the within-individual changes

92 with age. We mean-centered and standardised  $\Delta\text{age}$  so that *i*) individuals measured  
93 once all get a  $\Delta\text{age}=0$  so contribute to the variance of the  $\Delta\text{age}$  intercept but not to its  
94 slope and *ii*) to avoid collinearity and to have comparable variance for  $\Delta\text{age}$  and  
95  $\Delta\text{age}^2$ .

#### 96 *Testing ageing trajectories*

97 We tested several within-individual ageing trajectories of increasing complexity  
98 (linear, quadratic, threshold, terminal models, figure S1) and selected the model with  
99 the lowest AICc. For threshold models (figure S1C), we followed the approaches  
100 previously developed in [4,27]. Briefly, we first identified the best-fitting threshold age  
101 in a series of models, varying the threshold in the ' $\Delta\text{age}$ ' term between -35 to 22  
102 years with intervals of  $1\Delta\text{age}$  (=4.4 and 4.5 years for males and females respectively)  
103 and estimated the threshold and its confidence intervals using  $\pm 4\Delta\text{AIC}$  age range.  
104 Then we compared the best-fitting threshold model with the other ageing trajectories.  
105 Sometimes, declines in trait value appear shortly before death (terminal decline). We  
106 coded a 'terminal' change (figure S1D) as a binomial factor for whether an individual  
107 died during the year following the measurement. We used a one-year-window to  
108 avoid seasonal covariation in weight, but note that other time-windows gave  
109 consistent conclusions (figure S2). Because terminal changes can occur with each  
110 ageing trajectory, we tested their combinations. We also performed analyses using  
111 cubic smoothing splines, leading to consistent conclusions (results not shown).

#### 112 *Accounting for seasonal and spatial variation in body mass*

113 As body mass variation can be influenced by seasonal, spatial and within-individual  
114 factors, we accounted for whether body mass values were measured or estimated,  
115 individuals were alive or dead, captive- or wild-born, and the measurement season in  
116 the selected models (table S3). For females, 'ID' and 'township' were included as  
117 random intercepts, but 'YOB' was removed because of insufficient power to estimate  
118 its variance [28]. For males, only 'ID' was included for the same reasons. Note that  
119 for females, models with and without 'township' yielded consistent conclusions.

## 120 **Results**

121 At the measurements' starting age of 18 years, males were on average 294kg  
122 heavier than females, weighing respectively 2,601kg [95%CI: 2,472-2,738] and 2,307  
123 kg [95%CI: 2,259-2,355] and this difference was statistically significant.

124 Sexes displayed different body mass ageing trajectories ( $\Delta AICc = -33.7$ , figure 1, table  
125 1, table S2). Males showed a threshold body mass trajectory ( $\Delta AICc = -27.2$   
126 compared to a linear trajectory). They gained weight from age 18 till 48 ( $\Delta$ age  
127 scaled=1.9,  $\beta = 0.039 \pm 0.002$ ), then lost weight linearly: on average 39kg/year (1.3% of  
128 males mean weight,  $\beta = -0.055 \pm 0.014$ , figure 1A). In contrast, females gained weight  
129 linearly with age ( $\beta = 0.016 \pm 0.001$ ,  $\Delta AICc = -6.7$ ), followed by a terminal decline during  
130 their last year of life ( $\beta = -0.071 \pm 0.019$ ,  $\Delta AICc = -4.8$ , figure 1B and S2) during which  
131 they lost 173kg [95%CI: 80-263] or 6.8% [95%CI: 3.2-10.4] of their mean body mass.  
132 Males showed no statistical support for a terminal decline, neither in their best-fitting  
133 model nor in the equivalent model as for females ( $\Delta AICc = +4.9$ , table 1, figure S2A,  
134 97kg [95%CI: -22-209] or 4.2% [95%CI: -1.0-9.1]).

## 135 **Discussion**

136 We tested whether in a species with marked male-biased intrasexual competition,  
137 males showed an earlier and or faster rate of body mass ageing than females. Both  
138 sexes gained mass during early adulthood. However, males lost mass from 48 years  
139 old onwards. In contrast, females dropped in body mass much later, namely in their  
140 last years of life. Here we discuss the implications of our results in the light of  
141 theories of ageing [29] and of the management of elephants.

142 Asian elephants show male-biased intra-sexual competition being more  
143 aggressive[30], fighting more for dominance and showing higher rates of mortality at  
144 all ages than females, including during development and calfhood [19]. In such  
145 species, classic theory predicts that males should show an earlier onset or  
146 accelerated ageing [29]. Indeed, in several polygynous mammals, males display  
147 higher rates of body mass declines than females, suggested to be due to their higher  
148 intra-sexual competition [8,11]. Our results are consistent with those studies and with  
149 the prediction of the classic theory of ageing. Here, the prediction of the classic  
150 theory is not disrupted by high early-life condition-dependent mortality in males [13]  
151 or by canalisation [14].

152 Although male elephants in our timber elephant population may be used more for  
153 tasks requiring strength or tusks, generally both sexes fall under the same  
154 government-set workload, care and retirement regulation. It is also noteworthy that  
155 the female body mass decline occurred largely after retirement age, suggesting work  
156 schedules are unlikely to drive the ageing patterns. One substantial difference  
157 between sexes is parental care concentrated on females, as only females are given  
158 'parental leave' following reproduction [31]. However, since maternity is energetically  
159 expensive and no more favourable than timber working, this is unlikely to lead to  
160 delayed onset of body mass declines in females. An ideal test would be to analyse  
161 the effect of timber work and maternity leave on body mass dynamics, but this is  
162 beyond the scope of this manuscript. However, the possibility remains that in a wild  
163 (non-working) population of Asian elephants, sex-specific body mass trajectories with  
164 age are different from those found in our study.

165 For both sexes, it is possible that maximum body mass is set by constraints as  
166 indicated by the weight growth curves found earlier in this population [18]. At this  
167 point, we can only speculate as to why we found a maximum body mass in males but  
168 not in females. One possibility for the lack of a maximum in females is retirement (at  
169 around 50 years in both sexes), which likely diminishes physical exercise and allows  
170 more time for foraging, thereby continuing the weight gain. In contrast, male  
171 elephants reach a maximum body mass around the age of 48 possibly, because they  
172 benefit from being heavy during intrasexual competition [17].

173 We found that females experienced a terminal body mass decline in the last year of  
174 life. Our data contain both males and females among the oldest ages (>50), hence  
175 sex-specific terminal decline is unlikely to emerge from differences in lifespan. In  
176 European badgers (*Meles meles*), a species in which females outlive males, both  
177 sexes displayed terminal body mass declines [11]. It is possible that the sex-specific  
178 terminal declines in our study resulted from differences in power, with 5 dead males  
179 and 18 dead females. Indeed, for both males and females, the coefficient and effect  
180 size of the terminal terms were negative, but the effect size in males remained about  
181 half of that in females (Cohen's  $d_{\text{males}}=-0.044$  [-0.10,0.01], Cohen's  $d_{\text{females}}=-0.074$  [-  
182 0.11,-0.04]). Hence, it is possible that the sex-specific terminal effect is driven by  
183 power issues and we look forward to testing that with several more years of  
184 monitoring.



185 Terminal declines emphasise that the chronological age is rarely a perfect estimation  
186 of the biological age which can better describe the ‘true biological state’ of an  
187 organism [32]. In that sense, terminal decline is a biomarker of health and remaining  
188 lifespan. The ‘terminal illness’ hypothesis refers to the age-independent decrease of  
189 a trait value, related to the imminent death of the individual [33] and such terminal  
190 effects were shown for example for body mass and sexual signals in mammals and  
191 birds [11,34]. For which traits or under which conditions to expect terminal declines  
192 remains yet poorly understood but our study highlights the importance of studying  
193 sex-specific differences in ageing and illustrates the need to improve our  
194 understanding of the mechanisms driving the diversity of ageing patterns in the wild.

195 Data are available in the Dryad Digital Repository [35].

## 196 **References**

- 197 1. Monaghan P, Charmantier A, Nussey DH, Ricklefs RE. 2008 The evolutionary  
198 ecology of senescence. *Funct. Ecol.* **22**, 371–378. (doi:10.1111/j.1365-  
199 2435.2008.01418.x)
- 200 2. Jones OR *et al.* 2014 Diversity of ageing across the tree of life. *Nature* **505**, 169–  
201 173. (doi:10.1038/nature12789)
- 202 3. Nussey DH, Kruuk LEB, Morris A, Clutton-Brock TH. 2007 Environmental  
203 conditions in early life influence ageing rates in a wild population of red deer.  
204 *Curr. Biol.* **17**, R1000–R1001. (doi:10.1016/j.cub.2007.10.005)
- 205 4. Douhard F, Gaillard J-M, Pellerin M, Jacob L, Lemaître J-F. 2017 The cost of  
206 growing large: costs of post-weaning growth on body mass senescence in a wild  
207 mammal. *Oikos* **126**, 1329–1338. (doi:10.1111/oik.04421)
- 208 5. Rando TA, Wyss-Coray T. 2021 Asynchronous, contagious and digital aging. *Nat.*  
209 *Ageing* **1**, 29–35. (doi:10.1038/s43587-020-00015-1)
- 210 6. Maklakov AA, Lummaa V. 2013 Evolution of sex differences in lifespan and  
211 aging: Causes and constraints. *BioEssays* **35**, 717–724.  
212 (doi:10.1002/bies.201300021)
- 213 7. Bonduriansky R, Maklakov A, Zajitschek F, Brooks R. 2008 Sexual selection,  
214 sexual conflict and the evolution of ageing and life span. *Funct. Ecol.* **22**, 443–  
215 453. (doi:10.1111/j.1365-2435.2008.01417.x)
- 216 8. Clutton-Brock TH, Isvaran K. 2007 Sex differences in ageing in natural  
217 populations of vertebrates. *Proc. R. Soc. B Biol. Sci.* **274**, 3097–3104.  
218 (doi:10.1098/rspb.2007.1138)



- 219 9. Lemaître J-F *et al.* 2020 Sex differences in adult lifespan and aging rates of  
220 mortality across wild mammals. *Proc. Natl. Acad. Sci.* **117**, 8546–8553.  
221 (doi:10.1073/pnas.1911999117)
- 222 10. Tidière M, Gaillard J-M, Müller DWH, Lackey LB, Gimenez O, Clauss M, Lemaître  
223 J-F. 2015 Does sexual selection shape sex differences in longevity and  
224 senescence patterns across vertebrates? A review and new insights from captive  
225 ruminants. *Evolution* **69**, 3123–3140. (doi:10.1111/evo.12801)
- 226 11. Beirne C, Delahay R, Young A. 2015 Sex differences in senescence: The role of  
227 intra-sexual competition in early adulthood. *Proc. R. Soc. B Biol. Sci.* **282**,  
228 20151086. (doi:10.1098/rspb.2015.1086)
- 229 12. Nussey D, Kruuk L, Morris A, Clements M, Pemberton J, Clutton-Brock T. 2009  
230 Inter- and Intrasexual Variation in Aging Patterns across Reproductive Traits in a  
231 Wild Red Deer Population. *Am. Nat.* **174**, 342–57. (doi:10.1086/603615)
- 232 13. Chen H, Maklakov AA. 2014 Condition Dependence of Male Mortality Drives the  
233 Evolution of Sex Differences in Longevity. *Curr. Biol.* **24**, 2423–2427.  
234 (doi:10.1016/j.cub.2014.08.055)
- 235 14. Flatt T. 2005 The evolutionary genetics of canalization. *Q. Rev. Biol.* **80**, 287–  
236 316. (doi:10.1086/432265)
- 237 15. Hämäläinen A, Dammhahn M, Aujard F, Eberle M, Hardy I, Kappeler PM, Perret  
238 M, Schliehe-Diecks S, Kraus C. 2014 Senescence or selective disappearance?  
239 Age trajectories of body mass in wild and captive populations of a small-bodied  
240 primate. *Proc. R. Soc. B Biol. Sci.* **281**, 20140830. (doi:10.1098/rspb.2014.0830)
- 241 16. Mumby HS, Mar KU, Thitaram C, Courtiol A, Towiboon P, Min-Oo Z, Htut-Aung Y,  
242 Brown JL, Lummaa V. 2015 Stress and body condition are associated with  
243 climate and demography in Asian elephants. *Conserv. Physiol.* **3**, cov030.  
244 (doi:10.1093/conphys/cov030)
- 245 17. Sukumar R. 2003 *The living elephants: evolutionary ecology, behavior, and*  
246 *conservation*. New York: Oxford University Press.
- 247 18. Mumby HS, Chapman SN, Crawley JAH, Mar KU, Htut W, Thura Soe A, Aung  
248 HH, Lummaa V. 2015 Distinguishing between determinate and indeterminate  
249 growth in a long-lived mammal. *BMC Evol. Biol.* **15**, 214. (doi:10.1186/s12862-  
250 015-0487-x)
- 251 19. Lahdenperä M, Mar KU, Courtiol A, Lummaa V. 2018 Differences in age-specific  
252 mortality between wild-caught and captive-born Asian elephants. *Nat. Commun.*  
253 **9**, 3023. (doi:10.1038/s41467-018-05515-8)
- 254 20. Leimgruber P, Senior B, Aung M, Songer M, Mueller T, Wemmer C, Ballou J.  
255 2008 Modeling population viability of captive elephants in Myanmar (Burma):  
256 Implications for wild populations. *Anim. Conserv.* **11**, 198–205.  
257 (doi:10.1111/j.1469-1795.2008.00172.x)

- 258 21. Oo ZM. 2010 The training methods used in Myanmar Timber Enterprise. *Gajah*  
259 **33**, 58–61.
- 260 22. Zaw UK. 1997 Utilization of elephants in timber harvesting in Myanmar. *Gajah* **17**,  
261 9–22.
- 262 23. R Core Team. 2020 *R: A language and environment for statistical computing*.  
263 Vienne, Austria: R Foundation for Statistical Computing. See [https://www.R-](https://www.R-project.org)  
264 [project.org](https://www.R-project.org).
- 265 24. Bates D, Mächler M, Bolker B, Walker S. 2015 Fitting linear mixed-effects models  
266 using lme4. *J. Stat. Softw.* **67**, 1–48. (doi:10.18637/jss.v067.i01)
- 267 25. Bartoń K. 2019 *MuMIn: Multi-Model Inference*. See [https://CRAN.R-](https://CRAN.R-project.org/package=MuMIn)  
268 [project.org/package=MuMIn](https://CRAN.R-project.org/package=MuMIn).
- 269 26. van de Pol M, Verhulst S. 2006 Age-dependent traits: A new statistical model to  
270 separate within- and between-individual effects. *Am. Nat.* **167**, 766–773.  
271 (doi:10.1086/503331)
- 272 27. Briga M, Jimeno B, Verhulst S. 2019 Coupling lifespan and aging? The age at  
273 onset of body mass decline associates positively with sex-specific lifespan but  
274 negatively with environment-specific lifespan. *Exp. Gerontol.* **119**, 111–119.  
275 (doi:10.1016/j.exger.2019.01.030)
- 276 28. van de Pol M. 2012 Quantifying individual variation in reaction norms: how study  
277 design affects the accuracy, precision and power of random regression models.  
278 *Methods Ecol. Evol.* **3**, 268–280. (doi:[https://doi.org/10.1111/j.2041-](https://doi.org/10.1111/j.2041-210X.2011.00160.x)  
279 [210X.2011.00160.x](https://doi.org/10.1111/j.2041-210X.2011.00160.x))
- 280 29. Williams GC. 1957 Pleiotropy, natural selection, and the evolution of senescence.  
281 *Evolution* **11**, 398–411. (doi:10.2307/2406060)
- 282 30. Seltmann MW, Helle S, Htut W, Lahdenperä M. 2019 Males have more  
283 aggressive and less sociable personalities than females in semi-captive Asian  
284 elephants. *Sci. Rep.* **9**, 2668. (doi:10.1038/s41598-019-39915-7)
- 285 31. Toke Gale U. 1974 *Burmese timber elephant*. Rangoon, Burma: Trade  
286 Corporation.
- 287 32. Klemera P, Doubal S. 2006 A new approach to the concept and computation of  
288 biological age. *Mech. Ageing Dev.* **127**, 240–248.  
289 (doi:10.1016/j.mad.2005.10.004)
- 290 33. Coulson JC, Fairweather JA. 2001 Reduced reproductive performance prior to  
291 death in the Black-legged Kittiwake: senescence or terminal illness? *J. Avian Biol.*  
292 **32**, 146–152. (doi:10.1034/j.1600-048X.2001.320207.x)
- 293 34. Simons MJP, Briga M, Verhulst S. 2016 Stabilizing survival selection on  
294 presenescent expression of a sexual ornament followed by a terminal decline. *J.*  
295 *Evol. Biol.* **29**, 1368–1378. (doi:<https://doi.org/10.1111/jeb.12877>)

296 35. Lalande LD, Lummaa V, Aung HH, Win H, U Kyaw N, Berger V, Briga M. 2021  
297 Data from: Sex-specific body mass ageing trajectories in adult Asian elephants.  
298 *Dryad Digit. Repos.* (doi:10.5061/dryad.5dv41ns59)

299

**Table 1.** Selected models for males and females (bold). Model comparison describing the population body mass (bm) ageing trajectory. Models ranked from the least to most complex. For each model type, first is the model and second its equivalent adding the terminal decline factor as a fixed variable ('+terminal'). AICc: Akaike Information Criteria;  $\Delta$ AICc: relative AICc to the best model; k: degrees of freedom.

| Model type                         | Model                                                                                                                | Males    |                 |               | Females  |                 |               |
|------------------------------------|----------------------------------------------------------------------------------------------------------------------|----------|-----------------|---------------|----------|-----------------|---------------|
|                                    |                                                                                                                      | k        | AICc            | $\Delta$ AICc | k        | AICc            | $\Delta$ AICc |
| null                               | $\log(\text{bm}) \sim 1$                                                                                             | 3        | -2,867.7        | 330.13        | 4        | -5,443.3        | 160.43        |
| linear                             | $\log(\text{bm}) \sim \Delta\text{age} + \text{age-last}$                                                            | 5        | -3,170.7        | 27.15         | 6        | -5,586.3        | 17.47         |
| +terminal                          | $\log(\text{bm}) \sim \text{terminal} + \Delta\text{age} + \text{age-last}$                                          | 6        | -3,165.5        | 32.42         | 7        | -5,592.4        | 11.29         |
| age-last <sup>2</sup>              | $\log(\text{bm}) \sim \Delta\text{age} + \text{age-last} + \text{age-last}^2$                                        | 6        | -3,163.4        | 34.46         | 7        | -5,598.9        | 4.84          |
| <b>+terminal</b>                   | <b><math>\log(\text{bm}) \sim \text{terminal} + \Delta\text{age} + \text{age-last} + \text{age-last}^2</math></b>    | 7        | -3,158.2        | 39.72         | <b>8</b> | <b>-5,603.7</b> | <b>0.00</b>   |
| $\Delta\text{age}^2$               | $\log(\text{bm}) \sim \Delta\text{age} + \Delta\text{age}^2 + \text{age-last}$                                       | 6        | -3,184.6        | 13.26         | 7        | -5,571.7        | 32.01         |
| +terminal                          | $\log(\text{bm}) \sim \text{terminal} + \Delta\text{age} + \Delta\text{age}^2 + \text{age-last}$                     | 7        | -3,178.9        | 18.92         | 8        | -5,578.1        | 25.67         |
| quadratic                          | $\log(\text{bm}) \sim \Delta\text{age} + \Delta\text{age}^2 + \text{age-last} + \text{age-last}^2$                   | 7        | -3,177.3        | 20.60         | 8        | -5,584.5        | 19.26         |
| +terminal                          | $\log(\text{bm}) \sim \text{terminal} + \Delta\text{age} + \Delta\text{age}^2 + \text{age-last} + \text{age-last}^2$ | 8        | -3,171.6        | 26.25         | 9        | -5,589.5        | 14.25         |
| <b>threshold</b>                   | <b><math>\log(\text{bm}) \sim \Delta\text{age1} + \Delta\text{age2} + \text{age-last}</math></b>                     | <b>7</b> | <b>-3,197.9</b> | <b>0.00</b>   | 8        | -5,580.7        | 23.08         |
| +terminal                          | $\log(\text{bm}) \sim \text{terminal} + \Delta\text{age1} + \Delta\text{age2} + \text{age-last}$                     | 8        | -3,193.0        | 4.92          | 9        | -5,586.2        | 17.56         |
| threshold (age-last <sup>2</sup> ) | $\log(\text{bm}) \sim \Delta\text{age1} + \Delta\text{age2} + \text{age-last} + \text{age-last}^2$                   | 8        | -3,190.5        | 7.41          | 9        | -5,592.7        | 11.01         |
| terminal                           | $\log(\text{bm}) \sim \text{terminal} + \Delta\text{age1} + \Delta\text{age2} + \text{age-last} + \text{age-last}^2$ | 9        | -3,185.6        | 12.31         | 10       | -5,597.0        | 6.73          |

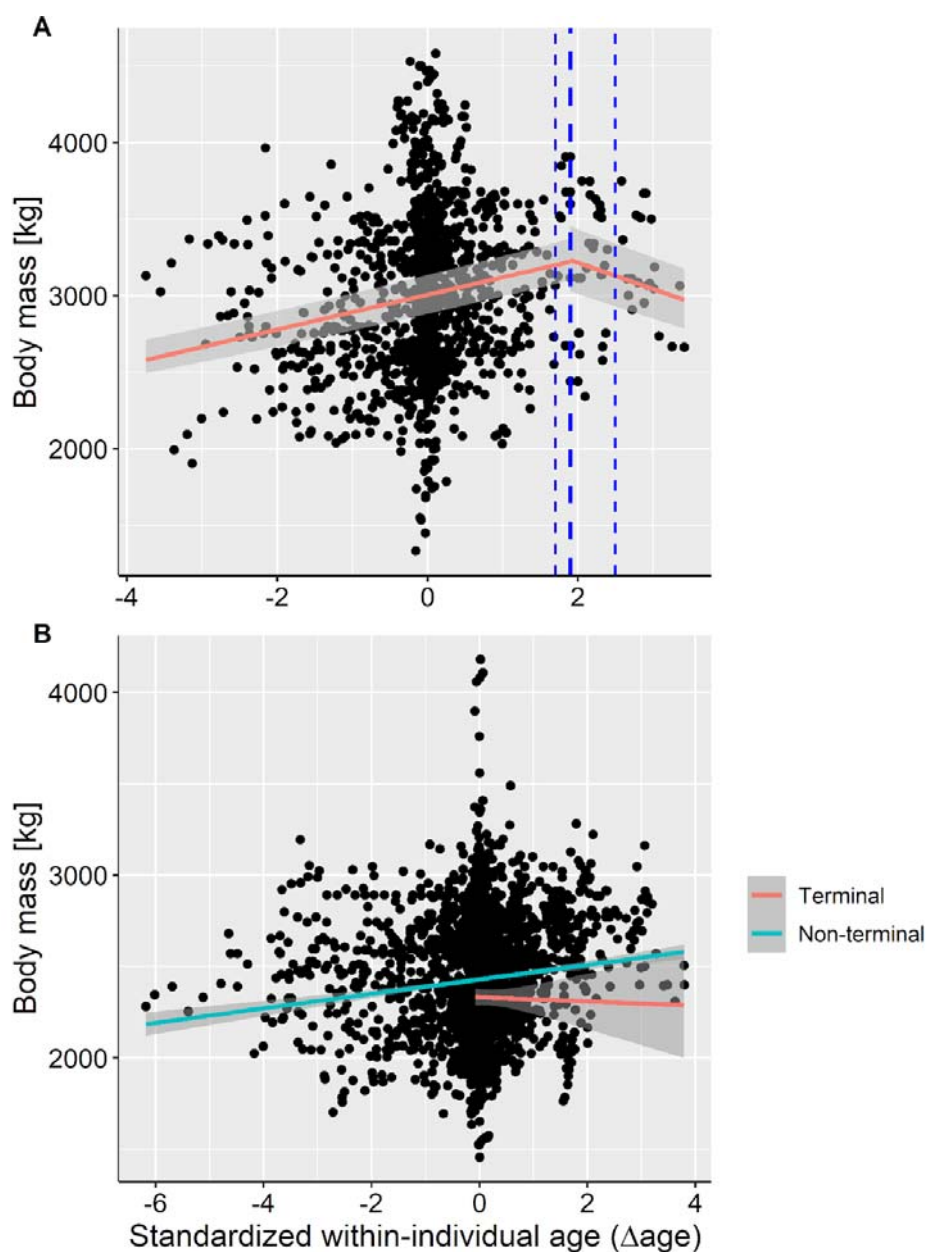

**Figure 1.** Body mass ageing trajectories. A) males (n=1,316 measurements on 171 individuals). B) females (n=2,570 measurements on 322 individuals). Prediction of the best-fitting models (table 1) with grey areas 95%CI. For males the thick dashed-line shows the threshold age at onset of the body mass decline (1.9 or 48 years) with thin dashed-lines the 4 $\Delta$ AICc CI [47.1,51.7]. For females, measurements in the terminal year (red) are significantly lower than measurements at other ages (blue).  $\Delta$ age: within-individual age.
