# 1                   **Sex-specific body mass ageing trajectories in adult Asian** 2                   **elephants**

3                   Lucas D. Lalande<sup>1,2,3,a</sup>, Virpi Lummaa<sup>1,a</sup>, Htoo H. Aung<sup>4</sup>, Win Htut<sup>4</sup>, U. Kyaw Nyein<sup>4</sup>,  
4                   Vérane Berger<sup>1,a,\*</sup>, Michael Briga<sup>1,a,\*</sup>

5  
6                   <sup>1</sup> Department of Biology, University of Turku, Turku, Finland;

7                   <sup>2</sup> Université Bourgogne Franche-Comté, Dijon, France;

8                   <sup>3</sup> Present address: Université de Lyon, Université Lyon 1, UMR CNRS 5558,  
9                   Villeurbanne CEDEX, France;

10                  <sup>4</sup> Myanma Timber Enterprise, Ministry of Natural Resources and Environmental  
11                  Conservation, West Gyogone Forest Compound, Yangon, Myanmar;

12                  \* Equal contribution of these authors

13                  <sup>a</sup> Corresponding authors: L. D. Lalande: [lucas.lalande@univ-lyon1.fr](mailto:lucas.lalande@univ-lyon1.fr), V. Lummaa:  
14                  [virpi.lummaa@gmail.com](mailto:virpi.lummaa@gmail.com), V. Berger: [verane.berger@orange.fr](mailto:verane.berger@orange.fr), M. Briga:  
15                  [michbriga@gmail.com](mailto:michbriga@gmail.com)

## 16                  **Abstract**

17                  In species with marked sexual dimorphism and where one sex undergoes stronger  
18                  intrasexual competition, that sex is expected to age earlier or quicker. Here, we utilise  
19                  a unique, longitudinal dataset of a semi-captive population of Asian elephants  
20                  (*Elephas maximus*), a species with marked male-biased intrasexual competition, with  
21                  males being larger and living shorter, and test the hypothesis that males show earlier  
22                  and/or faster body mass ageing than females. We show sex-specific body mass  
23                  ageing trajectories: adult males gained weight up to the age of 48 years old, followed  
24                  by a decrease in body mass until natural death. In contrast, adult females gained  
25                  body mass with age until a body mass decline in the last year of life. Our study shows  
26                  that sex-specific life-histories shape ageing patterns, consistent with the predictions  
27                  of the classical theory of ageing.

28                  **Keywords:** senescence, sex-differences, terminal decline, *Elephas maximus*, long-  
29                  term data

## 30 **Introduction**

31 Ageing – a decline in organismal functioning with age (Monaghan et al., 2008) – has  
32 been observed in many species (Jones et al., 2014). However, the onset and rates of  
33 ageing differ both between (Jones et al., 2014) and within species (Nussey et al.,  
34 2007) and between sexes (Douhard et al., 2017). A main challenge in ageing  
35 research is to quantify and explain such differences in the onset and rates of ageing  
36 (Rando & Wyss-Coray, 2021).

37 In species with sex-specific intrasexual competition, classic theory of ageing predicts  
38 that the sex with the highest intrasexual competition has a shorter lifespan and an  
39 earlier onset and/or higher rate of ageing (Maklakov & Lummaa, 2013). The rationale  
40 is that high intrasexual selection often results in one sex showing conspicuous  
41 displays or aggressive intrasexual behaviours, leading to increased mortality and a  
42 *live fast, die young* pace of life (Bonduriansky et al., 2008; Clutton-Brock & Isvaran,  
43 2007; Maklakov & Lummaa, 2013), thus displaying a weakened force of selection  
44 against antagonistically pleiotropic genes or deleterious mutations in late-life for that  
45 sex (Williams, 1957). Accordingly, in polygynous species with male-biased  
46 intrasexual competition, males often die earlier (Lemaître et al., 2020) and age earlier  
47 or faster than females (Beirne et al., 2015; Clutton-Brock & Isvaran, 2007; Douhard et  
48 al., 2017; Nussey et al., 2009; Tidière et al., 2015). However, recent conceptual  
49 developments have shown that this association can be disrupted. This can occur for  
50 example because of condition-dependent extrinsic mortality selecting particularly  
51 high-performing individuals in the population (Chen & Maklakov, 2014) or  
52 canalisation (*i.e.* the more a trait contributes to fitness, the less it should deviate from  
53 optimal trait value, with respect to environmental variation (Flatt, 2005)), thereby

54 contradicting the theoretically expected earlier or faster ageing in males. The extent  
55 to which such phenomena occur in nature remains unknown.

56 Here, we used a unique long-term dataset to describe sex-specific body mass ageing  
57 trajectories in a nutritionally unsupplemented semi-captive timber population of Asian  
58 elephants (*Elephas maximus*) living in their natural environment in Myanmar. Body  
59 mass is of interest in the study of ageing because it is positively associated with key  
60 life-history traits such as reproduction and lifespan in many non-human species  
61 (Hämäläinen et al., 2014). Therefore, the study of body mass ageing fits into the  
62 evolutionary framework of ageing. Accordingly, in Asian elephants, seasonal variation  
63 in body mass was positively associated with survival the following month (e.g. low  
64 body mass was associated with low survival during dry season) (Mumby, Mar,  
65 Thitaram, et al., 2015). Moreover, male Asian elephants benefit from being heavy  
66 during intrasexual competition for dominance and mating (Sukumar, 2003).

67 However, we know almost nothing about body mass ageing in elephants despite the  
68 interest in studying ageing in such a long-lived, social and sexually dimorphic non-  
69 human species. While females live in kin groups, adult males often roam solitary,  
70 undergo a more intense intrasexual competition for dominance and mating (Sukumar,  
71 2003) and hence are bigger, heavier (Mumby, Chapman, et al., 2015), more  
72 aggressive and less sociable (Seltmann et al., 2019) and shorter-lived than females  
73 (respective median lifespans: 30.8 and 44.7 years) (Lahdenperä et al., 2018). Based  
74 on this male-biased intrasexual competition and shorter lifespan, and following the  
75 classic theory of ageing, we expected males and females to display different body  
76 mass ageing trajectories as should be evidenced by an earlier onset and/or faster  
77 body mass loss in males than females (Bonduriansky et al., 2008; Maklakov &  
78 Lummaa, 2013).

## 79 **Material and methods**

### 80 **Study population**

81 We studied the world's largest semi-captive Asian elephant population  
82 consisting of around 3,000 individually-marked elephants owned by the government-  
83 run Myanma Timber Enterprise (MTE) (Leimgruber et al., 2008). Their birth, death,  
84 pedigree details, and morphological measurements have been recorded for almost a  
85 century by local veterinarians. These elephants are distributed across Myanmar in  
86 forest camps and used as riding, transport and drafting animals. Elephants work  
87 during the day and, at night, they socialise, mate and forage freely, unsupervised in  
88 forests (Oo, 2010; Zaw, 1997). There are no husbandry procedures and timber  
89 elephants are never culled. Calves born in captivity are cared for and nursed by their  
90 biological mother and allomothers (Lahdenperä et al., 2016; Lynch et al., 2019).  
91 Therefore, breeding rates are natural with no reproductive management. Moreover,  
92 there is minimal food provisioning, but elephants benefit from veterinary care that  
93 consists of treatment of simple injuries and monitoring of working conditions.

94 Both males and females are used in the workforce, and each working group of six  
95 elephants is composed of both sexes. Males and females follow the same  
96 government set limitations on taming age, working and retirement age, working-days  
97 per year, hours of work per day and tonnage pulled annually apply to both sexes,  
98 although it is possible that males might be used for somewhat different working tasks  
99 at times (e.g. when use of tusks is required; only males can possess long tusks in  
100 Asian elephants). Pregnant females are given a rest period from mid-pregnancy  
101 (around 11 months into gestation) until the calf is 1-year-old (Toke Gale, 1974), while  
102 they and their calf are being monitored by their mahouts (individual caretakers and

103 riders) throughout this period. Following this break, mothers are used for light work  
104 but are kept with calves at heel and able to suckle on demand until the calf is four or  
105 five years old (Oo, 2010) at which point calves are assigned a rider, name, logbook  
106 and registration number. After the training period, elephants are used for light work  
107 duties until the age of 17, when they enter the full workforce until retirement around  
108 age 50. The MTE maintains their care and logbooks until death.

### 109 **Data collection and selection**

110 Our analyses focused on age- and sex-specific variation in adult body mass  
111 from age 18 onwards, omitting the phase during which elephants grow in height  
112 (Mumby, Chapman, et al., 2015). From the logbooks, we extracted 1,901 body  
113 masses of 347 elephants with known sex, year of birth ('YOB'), alive or dead status,  
114 origin (captive-born or wild-caught) and measurement season (hot: Feb-May,  
115 monsoon: Jun-Sep, cold: Oct-Jan (Mumby, Mar, Thitaram, et al., 2015)) from 325  
116 working localities ('township'). Study elephants were aged 18 – 72 years (mean =  
117 39.3) and born 1941 – 1999. Age and cohort information were comparable between  
118 sexes, with 171 males (n = 1,316) born 1954 – 1999 and aged 18 – 64 years (mean  
119 = 37.4), and 322 females (n = 2,570) born 1941 – 1999 and aged 18 – 72 years  
120 (mean = 40.2).

121 When body mass measurements were not available, we estimated body  
122 masses using height to the shoulder and chest girth (n = 1,985 measurements on  
123 342 individuals, method in Supplementary Information 1). In Asian elephants, chest  
124 girth reflects changes in mass in addition to the fixed effect of structural size during  
125 adulthood (details in SI2).

126 Most elephants of this semi-captive population get at least occasionally  
127 measured for height and chest girth, with no selection with respect to their age, sex  
128 or condition. Body mass is measured only in camps provided with measurement  
129 scales (mainly in regions with the highest concentrations of elephants and the best  
130 accessibility). All elephants within the reach of those camps get weighed, again  
131 without any bias regarding their age, sex or condition. The logbooks containing these  
132 measurements have thus far been translated from Burmese to English mainly from  
133 the Sagaing region for logistic reason, but again without any bias or pre-selection of  
134 certain individuals.

135 In total, we obtained a median of 4.0 measurements/individual [2.5 – 97.5<sup>th</sup>  
136 percentiles: 1.0 – 36.4], followed for a median period of 2.8 years [2.5 – 97.5<sup>th</sup>: 0.0 –  
137 36.6] on 493 elephants (n = 3,886). Two influential observations measured at age 18  
138 and 23 were removed for one male because of particularly low  $\Delta$ age (Cook's  
139 distance = 0.61 and 0.25, mean of 0.001 on all males). Other observations for this  
140 male, all after age 50, were included.

#### 141 **Statistical analyses**

142 We investigated the age- and sex-specific variation in body mass in R version  
143 4.0.5 (R Core Team, 2020), using the body mass (log-transformed to reach normality  
144 of the variable and because of the allometric relationship between body mass and  
145 size) as a dependent variable with a normal error distribution. We first tested whether  
146 there were sex-specific ageing trajectories (Table S2) and then compared the sex-  
147 specific ageing trajectories using general additive mixed models (GAMs) with cubic  
148 regression splines (but note that other spline functions gave similar conclusions to  
149 those shown here) and general linear mixed models (GLMs), with respectively the

150 functions ‘gamm’ of the package ‘mgcv’ (Wood, 2017) and the function ‘lmer’ of the  
151 package ‘lme4’ (Bates et al., 2015). GAMs allow more flexible ageing trajectories  
152 than GLMs, but the more constrained ageing trajectories in GLMs allow a less  
153 descriptive identification of differences in ageing trajectories (Fig. S1) and both  
154 approaches gave consistent conclusions (see results section). We identified the best  
155 fitting models using the model selection approach based on the second order Akaike  
156 Information Criterion (AICc) as implemented in the package ‘MuMIn’ (Bartoń, 2019).  
157 In brief, the best fitting model has the lowest AICc value, with other models within 4  
158  $\Delta$ AICc being plausible and models become increasingly equivocal up to 14  $\Delta$ AICc,  
159 after which they become implausible (Burnham et al., 2011). Visual inspection of  
160 model residuals confirmed that these fulfilled all assumptions of distribution and  
161 homogeneity without any influential data points or outliers (see above).

#### 162 *Within- vs. between-individual change*

163 In all models, we accounted for non-independence of data due to repeated  
164 measurements from the same individual by including elephant identity (‘ID’) as a  
165 random intercept. The composition of the population can change with age for  
166 example due to selective disappearance of certain (e.g. lighter or heavier) individuals,  
167 which can affect the age trajectory. In order to alleviate this problem to the best  
168 possible in this long-lived species, we decomposed body mass changes with age into  
169 between- and within-individual changes following the approach developed by van  
170 de Pol & Verhulst, 2006 and van de Pol & Wright, 2009 using two terms: *i*) the age at  
171 last measurement for each individual, which captures the between-individual  
172 variations and *ii*) a ‘ $\Delta$ age’ term (age at measurement minus the individual’s mean age  
173 for all measurements) capturing the within-individual changes with age. We mean-  
174 centred and standardised ‘ $\Delta$ age’ so that *i*) individuals measured once all get a  $\Delta$ age

175 = 0 and hence contribute to the variance of the  $\Delta\text{age}$  intercept but not to its slope and  
176 *ii*) to avoid collinearity and to have comparable variance for  $\Delta\text{age}$  and  $\Delta\text{age}^2$  (Bolker,  
177 2008; Zuur et al., 2009). Our dataset included 105 individuals with one measurement  
178 after the age of 18 and we included these individuals by giving them  $\Delta\text{age} = 0$  (*i.e.*  
179 mean-centred) so they do not contribute to the coefficient but do contribute to the  
180 variance along the Y axis on  $\Delta\text{age} = 0$ , diminishing the likelihood of a false positive,  
181 and *ii*) do contribute to the coefficient of the age at last measurement term, thereby  
182 avoiding a bias in the dataset from selecting only the longer-lived or most monitored  
183 individuals.

#### 184 *Testing ageing trajectories*

185 We tested several within-individual ageing trajectories: GAMs can have any  
186 shape and for GLMs we tested linear, quadratic, threshold and terminal models (Fig.  
187 S1) and we selected the ageing trajectory with the lowest AICc. For GAMs, we  
188 identified the age at which maxima occurred based on the first-order derivative (= 0)  
189 using the function 'fderiv' of the package 'gratia' (Simpson & Singmann, 2021). For  
190 threshold models (Fig. S1C), we followed the approaches previously developed in  
191 Briga et al., 2019 and Douhard et al., 2017. In brief, we first identified the best-fitting  
192 threshold age in a series of models, varying the threshold in the ' $\Delta\text{age}$ ' term between  
193 -35 to 22 years with intervals of one  $\Delta\text{age}$  (1 mean-centered  $\Delta\text{age} = 4.4$  and 4.5  
194 years for males and females respectively) and estimated the threshold and its  
195 confidence intervals using  $\pm 4 \Delta\text{AIC}$  age range. Then we compared the best-fitting  
196 threshold model with the other ageing trajectories. Sometimes, declines in trait value  
197 appear shortly before death (terminal decline). We coded a 'terminal' change (Fig.  
198 S1D) as a binomial factor for whether an individual died during the year following the  
199 measurement. We used a one-year-window to avoid a possible seasonal covariation



200 in weight and because it was the best fitting time-window, but note that models with  
201 other time-windows gave consistent conclusions (Fig. S3).

## 202 *Accounting for temporal and spatial variation in body mass*

203 As body mass variation can be influenced by seasonal, spatial and within-  
204 individual factors, we tested whether body mass values were affected by (i)  
205 measured or estimated, (ii) individuals were alive or dead, (iii) captive- or wild-born  
206 and (iv) the measurement season. To this end we used a combination of backward  
207 elimination and forward selection approaches, *i.e.* first we analysed the models  
208 including these covariates using the most complex ageing trajectory, identified that  
209 none of these factors improved the model, then we eliminated these co-variables from  
210 the model, identified the best fitting ageing trajectory, and then we repeated the final  
211 models obtained with these covariates and identified again that none of these  
212 improved the model fit or altered the previously obtained conclusions (Table S3). In  
213 our models, we included as random intercepts individual identity to account for the  
214 repeated measurement of the same individual. We also included ‘township’ to  
215 account for the spatial clustering of individuals across Myanmar (except in male  
216 GLMs which lacked power), although actually adding township worsened the model  
217 fit (male GAM:  $\Delta\text{AICc} = +1.5$ ; female GAM:  $\Delta\text{AICc} = +0.6$ ).

## 218 **Results**

219 At the measurements’ starting age of 18 years, males were on average 253 kg  
220 heavier than females, weighing respectively 2,559 kg [95%CI: 2,431 – 2,694] and  
221 2,306 kg [95%CI: 2,258 – 2,355] and this difference was statistically significant  
222 ( $\Delta\text{AICc} = -122.6$  in a GLM with vs without sex as a fixed effect).

223 We identified the elephants body mass ageing trajectories using general additive  
224 models (GAMs) and general linear models (GLMs) and both approaches gave  
225 consistent results. Both analyses showed that sexes have different body mass  
226 ageing trajectories (GAM:  $\Delta\text{AICc} = -65.7$ , Fig. 1, Table S2; GLM:  $\Delta\text{AICc} = -47.0$ , Fig.  
227 2, Table S2) and hence, we identified the ageing trajectories for both sexes  
228 separately.

229 For males, both GAMs and GLMs indicated a body mass gain from age 18 years until  
230 their late-forties or early fifties (GAM maximum: 54 years, 95%CI: 53 – 56, Fig. S2;  
231 GLM maximum: 48.3 years, 4 AICc CI: 46.6 – 52.3, Fig. 2A), followed by a decline  
232 until death (Fig. 1A, Fig. 2A, Table 1). In GLMs, this maximum was shown through  
233 the best fit of a threshold model ( $\Delta\text{AICc} = -30.4$  compared to a linear trajectory):  
234 males gained mass at a rate of 21 kg/year [95%CI: 19.1 – 23.4] or 0.9% [95%CI: 0.9  
235 – 1.0] of males' mean body mass and then lost mass at a rate of 28 kg/year [95%CI:  
236 14.6 – 41.3] or 1.3% [95%CI: 0.7 – 1.8] of males' mean body mass (Fig. 2A).  
237 Regarding the decline, neither GAMs nor GLMs showed confident statistical support  
238 that it was terminal (*i.e.* determined by time before death rather than age): in GAMs,  
239 models with and without the terminal term were almost equivalent ( $\Delta\text{AICc}=+0.01$ ,  
240 Table 1) and in GLMs adding a terminal term worsened the model fit ( $\Delta\text{AICc}=+5.0$ ,  
241 Table 1, Fig. S3A).

242 For females, both GAMs and GLMs indicated a body mass gain throughout their lives  
243 until a terminal decline during their last year of life (Fig. 1B, Fig. 2B, Table 1). GLMs  
244 indicated a mass gain of 8 kg/year [95%CI: 7.4 – 10.3] or 0.3% [95%CI: 0.3 – 0.4] of  
245 females' mean body mass ( $\Delta\text{AICc} = -6.7$ , Table 1). Loss of body mass occurred in  
246 the last year of life (GAM:  $\Delta\text{AICc} = -12.2$ , Table 1, Fig. 1B; GLM:  $\Delta\text{AICc} = -4.9$ , Table  
247 1, Fig. 2B, Fig. S3B) and consisted of 173 kg [95%CI: 80 – 263] or 6.8% [95%CI: 3.2

248 – 10.4] of their mean body mass. For comparison, the extent of the terminal decline  
249 in males, if any, is just over half that in females at 97 kg [95%CI: -20 – 207] or 4.3%  
250 [95%CI: -0.9 – 9.2] of males' mean body mass (quantified in the aforementioned  
251 best-fitting threshold model).

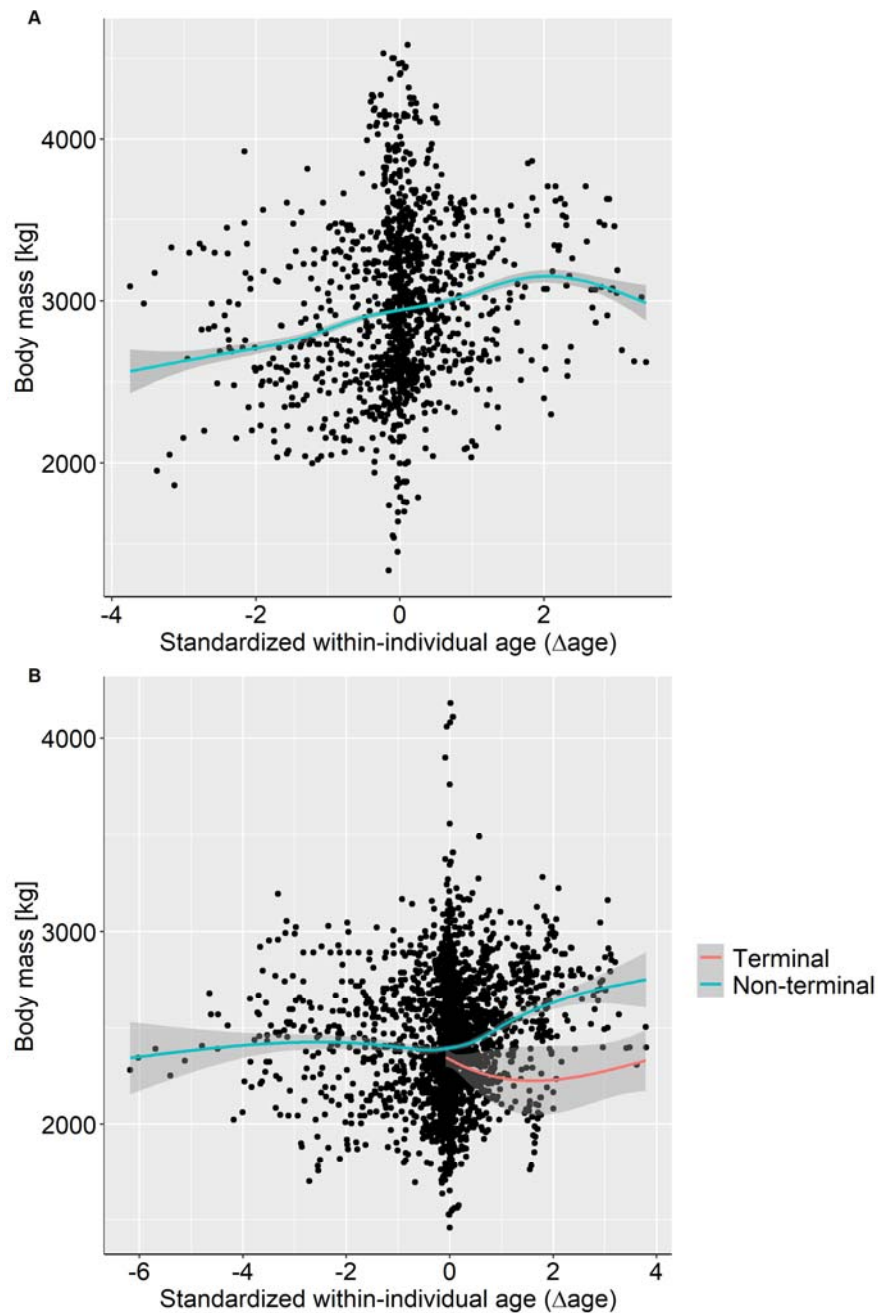

252

253 **Figure 1.** Body mass ageing trajectories of (A) males (n=1,316 measurements on  
254 171 individuals) and (B) females (n=2,570 measurements on 322 individuals) with

255 solid lines showing predictions of the best-fitting GAM models (Table 1) and grey  
256 areas 95%CI. For females, measurements in the terminal year (red) are significantly  
257 lower than measurements at other ages (grey), but note that the association (slope)  
258 with  $\Delta$ age is for illustration purposes only and was not statistically tested.

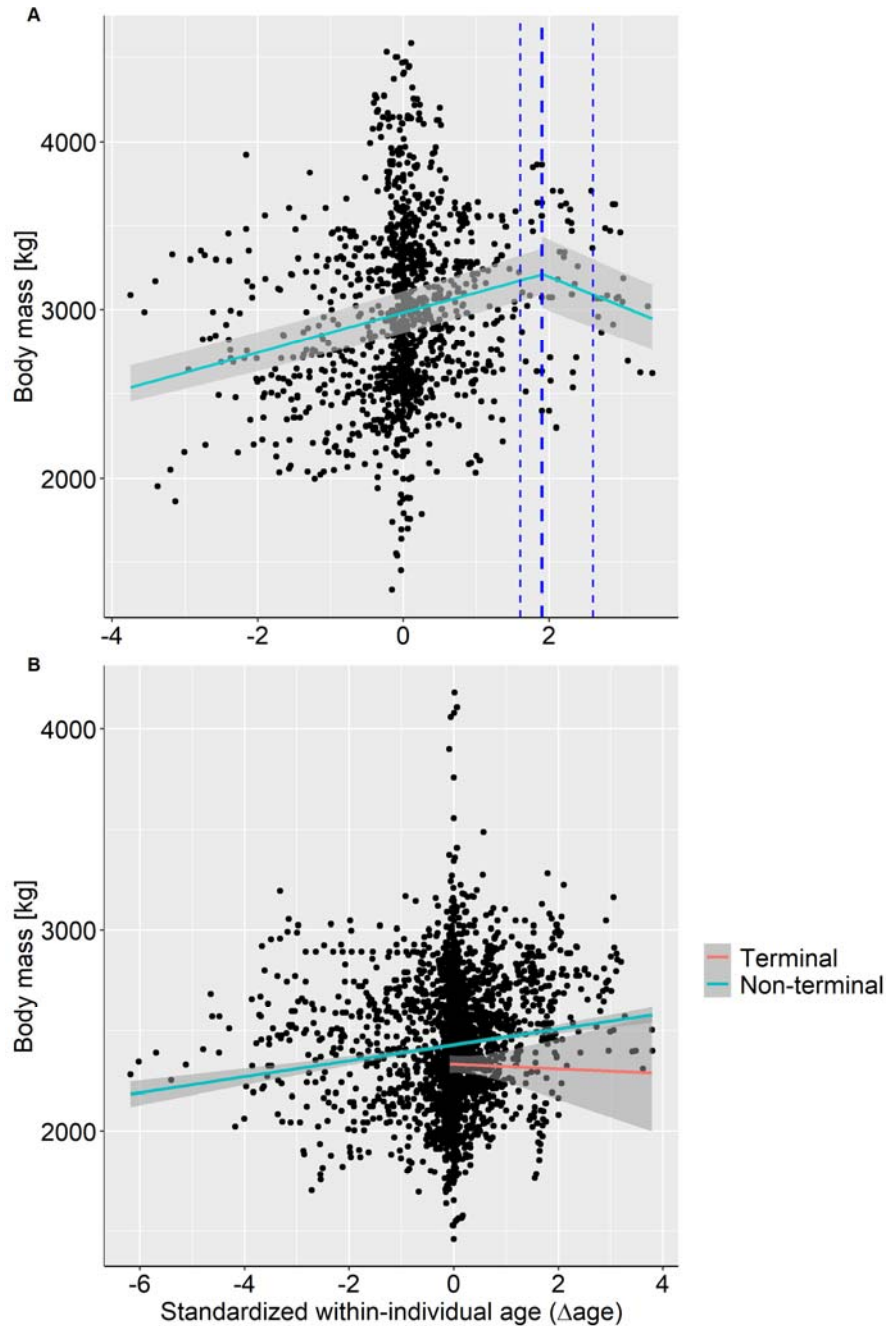

259

260 **Figure 2.** Body mass ageing trajectories of (A) males (n = 1,316 measurements on  
261 171 individuals) and (B) females (n = 2,570 measurements on 322 individuals) with  
262 predictions of the best-fitting GLMs (Table 1) with grey areas 95%CI. For males, the  
263 thick dashed-line shows the threshold age at onset of the body mass decline (1.9 or  
264 48.3 years) with thin dashed-lines the 4  $\Delta$ AICc-CI [46.6, 52.3]. For females,

265 measurements in the terminal year (red) are significantly lower (intercept) than  
266 measurements at other ages (blue). Note that the terminal slope is for illustration  
267 purposes only and was not statistically tested.

268 **Table 1.** Best fitting body mass ageing trajectories (bold) for males and females, using GAMs (top) and GLMs (bottom) with for  
 269 each model ageing trajectories ranked from the least to the most complex. AICc: second-order Akaike Information Criterion;  $\Delta$ AICc:  
 270 change in AICc relative to the best fitting model; k: degrees of freedom.

| Model type |                                    | Model                                                                                                                | k           | Males<br>AICc   | $\Delta$ AICc | k           | Females<br>AICc | $\Delta$ AICc |
|------------|------------------------------------|----------------------------------------------------------------------------------------------------------------------|-------------|-----------------|---------------|-------------|-----------------|---------------|
| <b>GAM</b> |                                    |                                                                                                                      |             |                 |               |             |                 |               |
|            | null                               | $\log(\text{bm}) \sim 1$                                                                                             | 4.0         | -2,835.8        | 386.1         | 4.0         | -5,422.6        | 217.1         |
|            | <b>smooth1</b>                     | <b><math>\log(\text{bm}) \sim s(\Delta\text{age}) + \text{age-last}</math></b>                                       | <b>8.1</b>  | <b>-3,221.9</b> | <b>0.0</b>    | 8.7         | -5,613.9        | 25.8          |
|            | +terminal                          | $\log(\text{bm}) \sim \text{terminal} + s(\Delta\text{age}) + \text{age-last}$                                       | 9.1         | -3,221.9        | 0.0           | 10.0        | -5,627.3        | 12.4          |
|            | smooth2                            | $\log(\text{bm}) \sim s(\Delta\text{age}) + \text{age-last} + \text{age-last}^2$                                     | 9.1         | -3,221.2        | 0.7           | 9.7         | -5,627.5        | 12.2          |
|            | <b>+terminal</b>                   | <b><math>\log(\text{bm}) \sim \text{terminal} + s(\Delta\text{age}) + \text{age-last} + \text{age-last}^2</math></b> | <b>10.1</b> | <b>-3,221.3</b> | <b>0.6</b>    | <b>10.9</b> | <b>-5,639.7</b> | <b>0.0</b>    |
| <b>GLM</b> |                                    |                                                                                                                      |             |                 |               |             |                 |               |
|            | null                               | $\log(\text{bm}) \sim 1$                                                                                             | 3.0         | -2,830.3        | 364.0         | 4.0         | -5,442.9        | 160.7         |
|            | linear                             | $\log(\text{bm}) \sim \Delta\text{age} + \text{age-last}$                                                            | 5.0         | -3,163.9        | 30.4          | 6.0         | -5,586.1        | 17.5          |
|            | +terminal                          | $\log(\text{bm}) \sim \text{terminal} + \Delta\text{age} + \text{age-last}$                                          | 6.0         | -3,158.7        | 35.6          | 7.0         | -5,592.3        | 11.3          |
|            | age-last <sup>2</sup>              | $\log(\text{bm}) \sim \Delta\text{age} + \text{age-last} + \text{age-last}^2$                                        | 6.0         | -3,156.4        | 37.9          | 7.0         | -5,598.7        | 4.9           |
|            | <b>+terminal</b>                   | <b><math>\log(\text{bm}) \sim \text{terminal} + \Delta\text{age} + \text{age-last} + \text{age-last}^2</math></b>    | <b>7.0</b>  | <b>-3,151.2</b> | <b>43.1</b>   | <b>8.0</b>  | <b>-5,603.6</b> | <b>0.0</b>    |
|            | $\Delta\text{age}^2$               | $\log(\text{bm}) \sim \Delta\text{age} + \Delta\text{age}^2 + \text{age-last}$                                       | 6.0         | -3,178.5        | 15.8          | 7.0         | -5,571.6        | 32.0          |
|            | +terminal                          | $\log(\text{bm}) \sim \text{terminal} + \Delta\text{age} + \Delta\text{age}^2 + \text{age-last}$                     | 7.0         | -3,172.9        | 21.4          | 8.0         | -5,577.9        | 25.7          |
|            | quadratic                          | $\log(\text{bm}) \sim \Delta\text{age} + \Delta\text{age}^2 + \text{age-last} + \text{age-last}^2$                   | 7.0         | -3,171.0        | 23.3          | 8.0         | -5,584.3        | 19.3          |
|            | +terminal                          | $\log(\text{bm}) \sim \text{terminal} + \Delta\text{age} + \Delta\text{age}^2 + \text{age-last} + \text{age-last}^2$ | 8.0         | -3,165.4        | 28.9          | 9.0         | -5,589.3        | 14.3          |
|            | <b>threshold</b>                   | <b><math>\log(\text{bm}) \sim \Delta\text{age1} + \Delta\text{age2} + \text{age-last}</math></b>                     | <b>7.0</b>  | <b>-3,194.3</b> | <b>0.0</b>    | 8.0         | -5,580.5        | 23.1          |
|            | +terminal                          | $\log(\text{bm}) \sim \text{terminal} + \Delta\text{age1} + \Delta\text{age2} + \text{age-last}$                     | 8.0         | -3,189.3        | 5.0           | 9.0         | -5,586.0        | 17.6          |
|            | threshold (age-last <sup>2</sup> ) | $\log(\text{bm}) \sim \Delta\text{age1} + \Delta\text{age2} + \text{age-last} + \text{age-last}^2$                   | 8.0         | -3,186.7        | 7.6           | 9.0         | -5,592.6        | 11.0          |
|            | terminal                           | $\log(\text{bm}) \sim \text{terminal} + \Delta\text{age1} + \Delta\text{age2} + \text{age-last} + \text{age-last}^2$ | 9.0         | -3,181.8        | 12.5          | 10.0        | -5,596.9        | 6.7           |

## 271 **Discussion**

272 We tested whether in a species with marked male-biased intrasexual competition,  
273 males showed an earlier and/or faster rate of body mass ageing than females. Both  
274 sexes gained mass during early adulthood. However, the onset of body mass ageing  
275 differed between both sexes: males began to lose mass from 48.3 years old  
276 onwards. In contrast, females lost body mass generally at an older age, namely in  
277 their last year of life. Compared to a previous study on growth curves of this  
278 population (Mumby, Chapman, et al., 2015), we are now using a larger dataset,  
279 including older and more numerous retired individuals. This allowed us to evidence  
280 body mass ageing in this species, which was not possible until now. Here we discuss  
281 the implications of our results in the light of theories of ageing (Williams, 1957) and of  
282 the management of Asian elephants.

283 We describe for the first time a sex-specific pattern of ageing in this species, as  
284 patterns of actuarial and reproductive ageing have only been described in females of  
285 this population (Hayward et al., 2014; Mumby, Mar, Hayward, et al., 2015; Robinson  
286 et al., 2012). Body mass ageing is often used in mammals as it may underpin  
287 actuarial and reproductive ageing (Beirne et al., 2015; Nussey et al., 2011). In  
288 absence of evidence for such sex-specific actuarial and reproductive ageing, due in  
289 part to the difficulty of measuring those in male elephants, our results provide  
290 valuable insights on how body condition declines with age in this long-lived, highly  
291 social species.

292 Asian elephants show male-biased intra-sexual competition, with males being more  
293 aggressive (Seltmann et al., 2019), fighting more for dominance and showing higher  
294 rates of mortality at all ages than females, including during early development, as

295 calves and during adulthood (Lahdenperä et al., 2018). In such species, classic  
296 theory predicts that males should show an earlier onset or accelerated ageing  
297 (Williams, 1957). Indeed, in several polygynous mammals, males display higher rates  
298 of body mass declines than females, suggested to be due to their stronger  
299 intrasexual competition (Clutton-Brock & Isvaran, 2007). For example, in European  
300 badgers (*Meles meles*, Beirne et al., 2015), Alpine marmots (*Marmota marmota*,  
301 Tafani et al., 2013) and Soay sheeps (*Ovis aries*, Hayward et al., 2015), males  
302 systematically showed stronger or earlier body mass ageing compared to females.  
303 Our results are consistent with those studies and with the prediction of the classic  
304 theory of ageing. Moreover, our results are inconsistent with later alternatives that  
305 suggest that the prediction of the classic theory can be disrupted by high early-life  
306 condition-dependent mortality in males (Chen & Maklakov, 2014) or by canalisation  
307 (Flatt, 2005).

308 Our study is subject to a number of limitations when it comes down to identifying why  
309 sexes may differ in their ageing trajectories. First, it is possible that male elephants in  
310 our timber elephant population are used more for tasks requiring strength or tusks,  
311 thereby causing an earlier onset of body mass declines in males than in females.  
312 However, both sexes fall under the same government-set workload, care and  
313 retirement regulation, except for females' maternity leave. One substantial difference  
314 between sexes is that parental care is concentrated on females, with for example  
315 only females being given 'parental leave' following reproduction (Toke Gale, 1974).  
316 However, since maternity is energetically expensive and no more favourable than  
317 timber working, this is unlikely to lead to the delayed onset of body mass declines in  
318 females. An ideal test would be to analyse the effect of timber work and maternity  
319 leave on body mass dynamics. Second, elephants have a specific dentition that



320 consists of molar teeth that eventually wear down at the end of their lives, and  
321 pathologic malocclusions or lack of molars can lead to weight loss and death by  
322 starvation. Although both sexes have the same molar dental anatomy, it is possible  
323 that the earlier onset of body mass declines in males may reflect sex-specific  
324 differences in tooth wear rather than sex-specific sexual selection. Indeed, in captive  
325 elephants, dental problems have been described well before the age at onset of the  
326 terminal decline found in this study (Gaillard et al., 2015) and, if there is sex-specific  
327 tooth wear, this could be associated with the earlier onset of body mass ageing in  
328 males. Third, male elephants have recurring periods of physiological “musth”  
329 throughout their adult lives, which can temporarily but profoundly impact the body  
330 mass of individual males (Eisenberg et al., 1971) thereby affecting the body mass  
331 ageing trajectory. Fourth, in our study, we did not find any evidence for body mass-  
332 based selective disappearance, but, as it is often the case in long-lived species, the  
333 average longitudinal individual monitoring is short relative to the lifespan of this  
334 species (e.g. Global BMI Mortality Collaboration et al., 2016; Prospective Studies  
335 Collaboration, 2009), and hence we only have limited power to detect such  
336 association. It is possible that there are sex-specific dynamics of selective  
337 disappearance, but whether that is the case in Asian elephants remains to be shown.  
338 An analysis with more longitudinal data would be useful to tackle this question. Fifth,  
339 for both sexes, it is possible that maximum body mass is set by physiological and  
340 ecological constraints as indicated by the weight growth curves found earlier in this  
341 population (Mumby, Chapman, et al., 2015). These constraints could be to some  
342 extent sex-specific, although at this point, we can only speculate as to why these  
343 constraints may drive sex-specific ageing trajectory. Finally, we found a maximum  
344 body mass in males but not in females. This sex-specific differences could be driven

345 by the fact that male elephants benefit more than females from being heavy during  
346 intrasexual competition (Sukumar, 2003). However, another factor to take into  
347 account is that retirement occurs at around 50 years in both sexes, which likely  
348 diminishes physical exercise and allows more time for foraging, thereby continuing  
349 the weight gain. The reduced intrasexual competition in females relative to males,  
350 together with this retirement, could lead to the continued mass gain of females. Given  
351 that elephants in the wild do not experience timber labour and retirement, we cannot  
352 exclude that the sex-specific body mass ageing trajectories could be different in a  
353 wild (non-working) population of Asian elephants compared to those found in our  
354 study.

355 We found that females experienced a terminal body mass decline in the last year of  
356 life. Our data contain both males and females among the oldest ages (>50), hence  
357 sex-specific terminal decline is unlikely to emerge from differences in lifespan. In  
358 European badgers, a species in which females outlive males, both sexes displayed  
359 terminal body mass declines (Beirne et al., 2015). It is possible that the sex-specific  
360 terminal declines in our study resulted from differences in power, with 5 old dead  
361 males and 18 old dead females. Indeed, for both males and females, the coefficient  
362 and effect size of the terminal terms were negative, but the effect size in males  
363 remained about half of that in females (Cohen's  $d_{\text{males}} = -0.045$  [-0.10, 0.01], Cohen's  
364  $d_{\text{females}} = -0.071$  [-0.11, -0.03]). Hence, it is possible that the sex-specific terminal  
365 effect is driven by power issues and we look forward to testing that with several more  
366 years of monitoring.

367 Terminal declines emphasise that the chronological age is rarely a perfect estimation  
368 of the biological age which can better describe the 'true biological state' of an  
369 organism (Klemera & Doubal, 2006). In that sense, terminal decline is a biomarker of

370 health and remaining lifespan. The ‘terminal illness’ hypothesis refers to the age-  
371 independent decrease of a trait value, related to the imminent death of the individual  
372 (Coulson & Fairweather, 2001). Such terminal effects were shown for example for  
373 body mass in mammals (stronger in males than females in European badgers  
374 (Beirne et al., 2015), in both sexes in Soay sheep (Hayward et al., 2015) and in male  
375 but not female Alpine marmots (Tafari et al., 2013)) and for sexual signals in birds  
376 (Simons et al., 2016). For which traits or under which conditions to expect terminal  
377 declines remains yet poorly understood but our study highlights the importance of  
378 studying sex-specific differences in ageing and illustrates the need to improve our  
379 understanding of the mechanisms driving the diversity of ageing patterns in the wild.

## 380 **References**

- 381 Bartoń, K. (2019). *MuMIn*: *Multi-Model Inference* (1.43.15) [Computer software]. [https://CRAN.R-](https://CRAN.R-project.org/package=MuMIn)  
382 [project.org/package=MuMIn](https://CRAN.R-project.org/package=MuMIn)
- 383 Bates, D., Mächler, M., Bolker, B., & Walker, S. (2015). Fitting linear mixed-effects models using lme4.  
384 *Journal of Statistical Software*, 67(1), 1–48. <https://doi.org/10.18637/jss.v067.i01>
- 385 Beirne, C., Delahay, R., & Young, A. (2015). Sex differences in senescence: The role of intra-sexual  
386 competition in early adulthood. *Proceedings of the Royal Society B: Biological Sciences*,  
387 282(1811), 20151086. <https://doi.org/10.1098/rspb.2015.1086>
- 388 Bolker, B. M. (2008). *Ecological Models and Data in R*. Princeton University Press.  
389 [https://press.princeton.edu/books/hardcover/9780691125220/ecological-models-and-data-](https://press.princeton.edu/books/hardcover/9780691125220/ecological-models-and-data-in-r)  
390 [in-r](https://press.princeton.edu/books/hardcover/9780691125220/ecological-models-and-data-in-r)
- 391 Bonduriansky, R., Maklakov, A., Zajitschek, F., & Brooks, R. (2008). Sexual selection, sexual conflict  
392 and the evolution of ageing and life span. *Functional Ecology*, 22(3), 443–453.  
393 <https://doi.org/10.1111/j.1365-2435.2008.01417.x>

- 394 Briga, M., Jimeno, B., & Verhulst, S. (2019). Coupling lifespan and aging? The age at onset of body  
395 mass decline associates positively with sex-specific lifespan but negatively with environment-  
396 specific lifespan. *Experimental Gerontology*, *119*, 111–119.  
397 <https://doi.org/10.1016/j.exger.2019.01.030>
- 398 Burnham, K. P., Anderson, D. R., & Huyvaert, K. P. (2011). AIC model selection and multimodel  
399 inference in behavioral ecology: Some background, observations, and comparisons.  
400 *Behavioral Ecology and Sociobiology*, *65*(1), 23–35. [https://doi.org/10.1007/s00265-010-](https://doi.org/10.1007/s00265-010-1029-6)  
401 [1029-6](https://doi.org/10.1007/s00265-010-1029-6)
- 402 Chen, H., & Maklakov, A. A. (2014). Condition Dependence of Male Mortality Drives the Evolution of  
403 Sex Differences in Longevity. *Current Biology*, *24*(20), 2423–2427.  
404 <https://doi.org/10.1016/j.cub.2014.08.055>
- 405 Clutton-Brock, T. H., & Isvaran, K. (2007). Sex differences in ageing in natural populations of  
406 vertebrates. *Proceedings of the Royal Society B: Biological Sciences*, *274*(1629), 3097–3104.  
407 <https://doi.org/10.1098/rspb.2007.1138>
- 408 Coulson, J. C., & Fairweather, J. A. (2001). Reduced reproductive performance prior to death in the  
409 Black-legged Kittiwake: Senescence or terminal illness? *Journal of Avian Biology*, *32*(2),  
410 146–152. <https://doi.org/10.1034/j.1600-048X.2001.320207.x>
- 411 Douhard, F., Gaillard, J.-M., Pellerin, M., Jacob, L., & Lemaître, J.-F. (2017). The cost of growing  
412 large: Costs of post-weaning growth on body mass senescence in a wild mammal. *Oikos*,  
413 *126*(9), 1329–1338. <https://doi.org/10.1111/oik.04421>
- 414 Eisenberg, J. F., McKay, G. M., & Jainudeen, M. R. (1971). Reproductive behavior of the Asiatic  
415 elephant (*Elephas maximus maximus* L.). *Behaviour*, *38*(3), 193–225.  
416 <https://doi.org/10.1163/156853971x00087>
- 417 Flatt, T. (2005). The evolutionary genetics of canalization. *The Quarterly Review of Biology*, *80*(3),  
418 287–316. <https://doi.org/10.1086/432265>

- 419 Gaillard, J.-M., Berger, V., Tidière, M., Duncan, P., & Lemaître, J.-F. (2015). Does tooth wear influence  
420 ageing? A comparative study across large herbivores. *Experimental Gerontology*, *71*, 48–55.  
421 <https://doi.org/10.1016/j.exger.2015.09.008>
- 422 Global BMI Mortality Collaboration, Di Angelantonio, E., Bhupathiraju, S., Wormser, D., Gao, P.,  
423 Kaptoge, S., Berrington de Gonzalez, A., Cairns, B., Huxley, R., Jackson, C., Joshy, G.,  
424 Lewington, S., Manson, J., Murphy, N., Patel, A., Samet, J., Woodward, M., Zheng, W., Zhou,  
425 M., ... Hu, F. (2016). Body-mass index and all-cause mortality: Individual-participant-data  
426 meta-analysis of 239 prospective studies in four continents. *The Lancet*, *388*(10046),  
427 776–786. [https://doi.org/10.1016/S0140-6736\(16\)30175-1](https://doi.org/10.1016/S0140-6736(16)30175-1)
- 428 Hämäläinen, A., Dammhahn, M., Aujard, F., Eberle, M., Hardy, I., Kappeler, P. M., Perret, M.,  
429 Schliehe-Diecks, S., & Kraus, C. (2014). Senescence or selective disappearance? Age  
430 trajectories of body mass in wild and captive populations of a small-bodied primate.  
431 *Proceedings of the Royal Society B: Biological Sciences*, *281*(1791), 20140830.  
432 <https://doi.org/10.1098/rspb.2014.0830>
- 433 Hayward, A. D., Mar, K. U., Lahdenperä, M., & Lummaa, V. (2014). Early reproductive investment,  
434 senescence and lifetime reproductive success in female Asian elephants. *Journal of*  
435 *Evolutionary Biology*, *27*(4), 772–783. <https://doi.org/10.1111/jeb.12350>
- 436 Hayward, A. D., Moorad, J., Regan, C. E., Berenos, C., Pilkington, J. G., Pemberton, J. M., & Nussey, D.  
437 H. (2015). Asynchrony of senescence among phenotypic traits in a wild mammal population.  
438 *Experimental Gerontology*, *71*, 56–68. <https://doi.org/10.1016/j.exger.2015.08.003>
- 439 Jones, O. R., Scheuerlein, A., Salguero-Gómez, R., Camarda, C. G., Schaible, R., Casper, B. B., Dahlgren,  
440 J. P., Ehrlén, J., García, M. B., Menges, E. S., Quintana-Ascencio, P. F., Caswell, H., Baudisch,  
441 A., & Vaupel, J. W. (2014). Diversity of ageing across the tree of life. *Nature*, *505*(7482),  
442 169–173. <https://doi.org/10.1038/nature12789>

- 443 Klemera, P., & Doubal, S. (2006). A new approach to the concept and computation of biological age.  
444 *Mechanisms of Ageing and Development*, 127(3), 240–248.  
445 <https://doi.org/10.1016/j.mad.2005.10.004>
- 446 Lahdenperä, M., Mar, K. U., Courtiol, A., & Lummaa, V. (2018). Differences in age-specific mortality  
447 between wild-caught and captive-born Asian elephants. *Nature Communications*, 9(1), 3023.  
448 <https://doi.org/10.1038/s41467-018-05515-8>
- 449 Lahdenperä, M., Mar, K. U., & Lummaa, V. (2016). Nearby grandmother enhances calf survival and  
450 reproduction in Asian elephants. *Scientific Reports*, 6(1), 27213.  
451 <https://doi.org/10.1038/srep27213>
- 452 Leimgruber, P., Senior, B., Aung, M., Songer, M., Mueller, T., Wemmer, C., & Ballou, J. (2008).  
453 Modeling population viability of captive elephants in Myanmar (Burma): Implications for  
454 wild populations. *Animal Conservation*, 11, 198–205. [https://doi.org/10.1111/j.1469-](https://doi.org/10.1111/j.1469-1795.2008.00172.x)  
455 [1795.2008.00172.x](https://doi.org/10.1111/j.1469-1795.2008.00172.x)
- 456 Lemaître, J.-F., Ronget, V., Tidière, M., Allainé, D., Berger, V., Cohas, A., Colchero, F., Conde, D. A.,  
457 Garratt, M., Liker, A., Marais, G. A. B., Scheuerlein, A., Székely, T., & Gaillard, J.-M. (2020). Sex  
458 differences in adult lifespan and aging rates of mortality across wild mammals. *Proceedings*  
459 *of the National Academy of Sciences*, 117(15), 8546–8553.  
460 <https://doi.org/10.1073/pnas.1911999117>
- 461 Lynch, E. C., Lummaa, V., Htut, W., & Lahdenperä, M. (2019). Evolutionary significance of maternal  
462 kinship in a long-lived mammal. *Philosophical Transactions of the Royal Society B: Biological*  
463 *Sciences*, 374(1780), 20180067. <https://doi.org/10.1098/rstb.2018.0067>
- 464 Maklakov, A. A., & Lummaa, V. (2013). Evolution of sex differences in lifespan and aging: Causes and  
465 constraints. *BioEssays*, 35, 717–724. <https://doi.org/10.1002/bies.201300021>
- 466 Monaghan, P., Charmantier, A., Nussey, D. H., & Ricklefs, R. E. (2008). The evolutionary ecology of  
467 senescence. *Functional Ecology*, 22(3), 371–378. [https://doi.org/10.1111/j.1365-](https://doi.org/10.1111/j.1365-2435.2008.01418.x)  
468 [2435.2008.01418.x](https://doi.org/10.1111/j.1365-2435.2008.01418.x)

- 469 Mumby, H. S., Chapman, S. N., Crawley, J. A. H., Mar, K. U., Htut, W., Thura Soe, A., Aung, H. H., &  
470 Lummaa, V. (2015). Distinguishing between determinate and indeterminate growth in a long-  
471 lived mammal. *BMC Evolutionary Biology*, *15*(1), 214. [https://doi.org/10.1186/s12862-015-](https://doi.org/10.1186/s12862-015-0487-x)  
472 0487-x
- 473 Mumby, H. S., Mar, K. U., Hayward, A. D., Htut, W., Htut-Aung, Y., & Lummaa, V. (2015). Elephants  
474 born in the high stress season have faster reproductive ageing. *Scientific Reports*, *5*(1),  
475 13946. <https://doi.org/10.1038/srep13946>
- 476 Mumby, H. S., Mar, K. U., Thitaram, C., Courtiol, A., Towiboon, P., Min-Oo, Z., Htut-Aung, Y., Brown, J.  
477 L., & Lummaa, V. (2015). Stress and body condition are associated with climate and  
478 demography in Asian elephants. *Conservation Physiology*, *3*(1), cov030.  
479 <https://doi.org/10.1093/conphys/cov030>
- 480 Nussey, D. H., Coulson, T., Delorme, D., Clutton-Brock, T. H., Pemberton, J. M., Festa-Bianchet, M., &  
481 Gaillard, J.-M. (2011). Patterns of body mass senescence and selective disappearance differ  
482 among three species of free-living ungulates. *Ecology*, *92*(10), 1936–1947. JSTOR.  
483 <https://doi.org/10.1890/11-0308.1>
- 484 Nussey, D. H., Kruuk, L. E. B., Morris, A., & Clutton-Brock, T. H. (2007). Environmental conditions in  
485 early life influence ageing rates in a wild population of red deer. *Current Biology*, *17*(23),  
486 R1000–R1001. <https://doi.org/10.1016/j.cub.2007.10.005>
- 487 Nussey, D. H., Kruuk, L., Morris, A., Clements, M., Pemberton, J., & Clutton-Brock, T. (2009). Inter-  
488 and Intrasexual Variation in Aging Patterns across Reproductive Traits in a Wild Red Deer  
489 Population. *The American Naturalist*, *174*, 342–357. <https://doi.org/10.1086/603615>
- 490 Oo, Z. M. (2010). The training methods used in Myanma Timber Enterprise. *Gajah*, *33*, 58–61.
- 491 Prospective Studies Collaboration. (2009). Body-mass index and cause-specific mortality in 900 000  
492 adults: Collaborative analyses of 57 prospective studies. *The Lancet*, *373*(9669), 1083–1096.  
493 [https://doi.org/10.1016/S0140-6736\(09\)60318-4](https://doi.org/10.1016/S0140-6736(09)60318-4)

- 494 R Core Team. (2020). *R: A language and environment for statistical computing*. R Foundation for  
495 Statistical Computing. <https://www.R-project.org>
- 496 Rando, T. A., & Wyss-Coray, T. (2021). Asynchronous, contagious and digital aging. *Nature Aging*,  
497 1(1), 29–35. <https://doi.org/10.1038/s43587-020-00015-1>
- 498 Robinson, M. R., Mar, K. U., & Lummaa, V. (2012). Senescence and age-specific trade-offs between  
499 reproduction and survival in female Asian elephants: Age-specific reproduction and survival.  
500 *Ecology Letters*, 15(3), 260–266. <https://doi.org/10.1111/j.1461-0248.2011.01735.x>
- 501 Seltmann, M. W., Helle, S., Htut, W., & Lahdenperä, M. (2019). Males have more aggressive and less  
502 sociable personalities than females in semi-captive Asian elephants. *Scientific Reports*, 9(1),  
503 2668. <https://doi.org/10.1038/s41598-019-39915-7>
- 504 Simons, M. J. P., Briga, M., & Verhulst, S. (2016). Stabilizing survival selection on presenescent  
505 expression of a sexual ornament followed by a terminal decline. *Journal of Evolutionary*  
506 *Biology*, 29(7), 1368–1378. <https://doi.org/10.1111/jeb.12877>
- 507 Simpson, G. L., & Singmann, H. (2021). *gratia*: Graceful 'ggplot'-based graphics and other functions  
508 for GAMs fitted using « mgcv » (0.6.0) [Computer software].
- 509 Sukumar, R. (2003). *The living elephants: Evolutionary ecology, behavior, and conservation*. Oxford  
510 University Press.
- 511 Tafani, M., Cohas, A., Bonenfant, C., Gaillard, J.-M., Lardy, S., & Allainé, D. (2013). Sex-specific  
512 senescence in body mass of a monogamous and monomorphic mammal: The case of Alpine  
513 marmots. *Oecologia*, 172(2), 427–436. <https://doi.org/10.1007/s00442-012-2499-1>
- 514 Tidière, M., Gaillard, J.-M., Müller, D. W. H., Lackey, L. B., Gimenez, O., Clauss, M., & Lemaître, J.-F.  
515 (2015). Does sexual selection shape sex differences in longevity and senescence patterns  
516 across vertebrates? A review and new insights from captive ruminants. *Evolution*, 69(12),  
517 3123–3140. <https://doi.org/10.1111/evo.12801>
- 518 Toke Gale, U. (1974). *Burmese timber elephant*. Trade Corporation.



- 519 van de Pol, M., & Verhulst, S. (2006). Age-dependent traits: A new statistical model to separate  
520 within- and between-individual effects. *The American Naturalist*, *167*(5), 766–773.  
521 <https://doi.org/10.1086/503331>
- 522 van de Pol, M., & Wright, J. (2009). A simple method for distinguishing within- versus between-  
523 subject effects using mixed models. *Animal Behaviour*, *77*(3), 753–758.  
524 <https://doi.org/10.1016/j.anbehav.2008.11.006>
- 525 Williams, G. C. (1957). Pleiotropy, natural selection, and the evolution of senescence. *Evolution*,  
526 *11*(4), 398–411. <https://doi.org/10.2307/2406060>
- 527 Wood, S. (2017). Generalized Additive Models: An Introduction With R. In *Generalized Additive*  
528 *Models: An Introduction with R, Second Edition* (2nd éd., Vol. 66). Chapman and Hall/CRC  
529 Press. <https://doi.org/10.1201/9781315370279>
- 530 Zaw, U. K. (1997). Utilization of elephants in timber harvesting in Myanmar. *Gajah*, *17*, 9–22.
- 531 Zuur, A., Ieno, E. N., Walker, N., Saveliev, A. A., & Smith, G. M. (2009). *Mixed Effects Models and*  
532 *Extensions in Ecology with R*. Springer-Verlag. <https://doi.org/10.1007/978-0-387-87458-6>
- 533
