33 **Keywords:** Elephas maximus, long-term data, senescence, sex-differences, terminal  
34 decline

## 35 **Introduction**

36 Ageing – a decline in organismal functioning with age (Monaghan et al., 2008) – has  
37 been observed in many species (Jones et al., 2014). However, the onset and rates of  
38 ageing differ both between (Jones et al., 2014) and within species (Nussey et al.,  
39 2007) and between sexes (Clutton-Brock & Isvaran, 2007; Lemaître et al., 2020;  
40 Tidière et al., 2015). A main challenge in ageing research is to quantify and explain  
41 such differences in the onset and rates of ageing (Rando & Wyss-Coray, 2021).

42 In species with sex-specific intrasexual competition, classical theory of ageing  
43 predicts that the sex with the highest intrasexual competition has a shorter lifespan  
44 and an earlier onset and/or higher rate of ageing (Williams, 1957). The rationale is  
45 that high intrasexual selection often results in one sex showing conspicuous displays  
46 or aggressive intrasexual behaviours, leading to increased mortality and a *live fast,  
47 die young* pace of life (Bonduriansky et al., 2008; Clutton-Brock & Isvaran, 2007;  
48 Maklakov & Lummaa, 2013). For that sex, antagonistically pleiotropic genes or  
49 deleterious mutations are not counter selected due to a weakened force of selection  
50 in late-life (Williams, 1957). Accordingly, in polygynous species with male-biased  
51 intrasexual competition, males often die earlier (Lemaître et al., 2020) and age earlier  
52 or faster than females (Beirne et al., 2015; Clutton-Brock & Isvaran, 2007; Douhard et  
53 al., 2017; Nussey et al., 2009; Tidière et al., 2015). However, recent conceptual  
54 developments have shown that this association can be disrupted. This can occur for  
55 example because of condition-dependent extrinsic mortality selecting particularly  
56 high-performing individuals in the population (Chen & Maklakov, 2014) or  
57 canalisation (*i.e.* the more a trait contributes to fitness, the less it should deviate from

58 optimal trait value, with respect to environmental variation (Flatt, 2005)), thereby  
59 contradicting the theoretically expected earlier or faster ageing in males. The extent  
60 to which such phenomena occur in nature remains unknown.

61 Here, we used a unique long-term dataset to describe sex-specific body mass ageing  
62 trajectories in a nutritionally unsupplemented semi-captive timber population of Asian  
63 elephants (*Elephas maximus*) living in their natural environment in Myanmar. Body  
64 mass is of interest in the study of ageing because it is positively associated with key  
65 life-history traits such as reproduction and lifespan in many non-human species  
66 (Briga et al., 2019; Gaillard et al., 2000; Hämäläinen et al., 2014; Pelletier et al.,  
67 2007). Therefore, the study of body mass ageing fits into the evolutionary framework  
68 of ageing. Accordingly, in Asian elephants, seasonal variation in body mass was  
69 positively associated with survival the following month (e.g. low body mass was  
70 associated with low survival during dry season) (Mumby, Mar, Thitaram, et al., 2015).  
71 Moreover, male Asian elephants benefit from being heavy during intrasexual  
72 competition for dominance and mating (Sukumar, 2003).

73 However, we know almost nothing about body mass ageing in elephants despite the  
74 interest in studying ageing in such a long-lived, social and sexually dimorphic non-  
75 human species. While females live in kin groups, adult males often roam solitarily,  
76 undergo a more intense intrasexual competition for dominance and mating (Sukumar,  
77 2003) and hence are bigger, heavier (Mumby, Chapman, et al., 2015), more  
78 aggressive and less sociable (Seltmann et al., 2019) and shorter-lived than females  
79 (respective median lifespans in this population: 30.8 and 44.7 years) (Lahdenperä et  
80 al., 2018). Based on this male-biased intrasexual competition and shorter lifespan,  
81 and following the classical theory of ageing (Williams, 1957), we tested the prediction

82 that males experience an earlier and/or faster body mass loss than  
83 females (Bonduriansky et al., 2008; Maklakov & Lummaa, 2013).

## 84 **Material and methods**

### 85 **Study population**

86 We studied the world's largest semi-captive Asian elephant population  
87 consisting of around 3,000 individually-marked elephants owned by the government-  
88 run Myanma Timber Enterprise (MTE) (Leimgruber et al., 2008). Their birth, death,  
89 maternal-lineage pedigree, and morphological measurements have been recorded  
90 for almost a century by local veterinarians. These elephants are distributed across  
91 Myanmar in forest camps and used as riding, transport and drafting animals.  
92 Elephants work during the day and, at night, they socialise, mate and forage freely,  
93 unsupervised in forests (Oo, 2010; Zaw, 1997). There are no husbandry procedures  
94 and timber elephants are never culled. Calves born in captivity are cared for and  
95 nursed by their biological mother and allomothers (Lahdenperä et al., 2016; Lynch et  
96 al., 2019). Therefore, breeding rates are natural with no reproductive management.  
97 Moreover, there is minimal food provisioning, but elephants benefit from veterinary  
98 care that consists of treatment of simple injuries and monitoring of working  
99 conditions.

100 Both males and females are used in the workforce, and each working group of six  
101 elephants is composed of both sexes. Males and females follow the same  
102 government set limitations on taming age, working and retirement age, working-days  
103 per year, hours of work per day and tonnage pulled annually apply to both sexes,  
104 although it is possible that males might be used for somewhat different working tasks

105 at times (e.g. when use of tusks is required; only males can possess long tusks in  
106 Asian elephants). Pregnant females are given a rest period from mid-pregnancy  
107 (around 11 months into gestation) until the calf is 1-year-old (Toke Gale, 1974), while  
108 they and their calf are being monitored by their mahouts (individual caretakers and  
109 riders) throughout this period. Following this break, mothers are used for light work  
110 but are kept with calves at heel and able to suckle on demand until the calf is four or  
111 five years old (Oo, 2010) at which point calves are assigned a rider, name, logbook  
112 and registration number. After the training period, elephants are used for light work  
113 duties until the age of 17, when they enter the full workforce until retirement around  
114 age 50. The MTE maintains their care and logbooks until death.

#### 115 **Data collection and selection**

116 Our analyses focused on age- and sex-specific variation in adult body mass  
117 from age 18 onwards, in order to omit the phase during which elephants grow in  
118 height (Mumby, Chapman, et al., 2015) and to focus only on adult body mass age-  
119 specific variations. We compiled a total of 3,886 body masses on 493 individuals  
120 (2,570 body masses on 322 females, and 1,316 body masses on 171 males). These  
121 data came from two sources: (i) body masses were either measured on elephants on  
122 the field or (ii) estimated using height to the shoulder and chest girth (method in  
123 Supplementary Information 1). For the first source, we extracted 1,901 body masses  
124 of 347 elephants (1,297 measurements on 230 females, and 604 measurements on  
125 117 males) and for the second source we estimated 1,985 body masses on 342  
126 individuals (1,273 estimations on 226 females, and 712 estimations on 116 males - a  
127 same individual can have both measured and estimated body masses). For all  
128 elephants of the 325 working localities ('township') sampled, sex, year of birth  
129 ('YOB'), alive or dead status at the moment of the study, origin (captive-born or wild-

130 caught) and measurement season (hot: Feb-May, monsoon: Jun-Sep, cold: Oct-Jan  
131 (Mumby, Mar, Thitaram, et al., 2015)) were known. The alive or dead status was  
132 used to test for potential terminal decline. Among the 493 individuals considered, 5  
133 males (63 observations) and 18 females (185 observations) were known to be dead.  
134 We had measurements during the last year of life for 2 males (7 observations) and 10  
135 females (54 observations). Study elephants were aged 18 – 72 years (mean = 39.3)  
136 and born 1941 – 1999. Age and cohort information were comparable between sexes,  
137 with 171 males (n = 1,316) born 1954 – 1999 and aged 18 – 64 years (mean = 37.4),  
138 and 322 females (n = 2,570) born 1941 – 1999 and aged 18 – 72 years (mean =  
139 40.2).

140 Most elephants of this semi-captive population get at least occasionally  
141 measured for height and chest girth, with no selection with respect to their age, sex  
142 or condition. Body mass is measured only in camps provided with measurement  
143 scales (mainly in regions with the highest concentrations of elephants and the best  
144 accessibility). All elephants within the reach of those camps get weighed, again  
145 without any bias regarding their age, sex or condition. The logbooks containing these  
146 measurements have thus far been translated from Burmese to English mainly from  
147 the Sagaing region for logistic reasons, but again without any bias or pre-selection of  
148 certain individuals.

149 In total, we obtained a median of 4.0 measurements/individual (2.5 – 97.5<sup>th</sup>  
150 percentiles: [1.0; 36.4], followed during a median period of 2.8 years (2.5 – 97.5<sup>th</sup>:  
151 [0.0; 36.6] on 493 elephants (n = 3,886). Two influential observations measured at  
152 age 18 and 23 were removed for one male because of particularly low  $\Delta$ age (Cook's  
153 distance = 0.61 and 0.25, mean of 0.001 on all males). Other observations for this  
154 male, all after age 50, were included.

## 155 **Statistical analyses**

156 We investigated the age- and sex-specific variation in body mass in R version  
157 4.1.1 (R Core Team, 2021), using the body mass (log-transformed to reach normality  
158 of the variable and because of the allometric relationship between body mass and  
159 size) as a dependent variable with a normal error distribution. First, we tested in a  
160 single model, whether there were sex-specific ageing trajectories using an interaction  
161 term (Table S2). Given that this interaction was statistically significant, we compared  
162 the sex-specific ageing trajectories for both sexes separately. We did these analyses  
163 using both general additive mixed models (GAMMs) with cubic regression splines  
164 (but note that other spline functions gave similar conclusions as those shown here)  
165 and general linear mixed models (GLMMs) with respectively the functions ‘`gamm`’ of  
166 the package ‘`mgcv`’ (v. 1.8-36, Wood, 2011) and the function ‘`lmer`’ of the package  
167 ‘`lme4`’ (v. 1.1-27.1, Bates et al., 2015)). GAMMs allow more flexible ageing  
168 trajectories than GLMMs, but the more constrained ageing trajectories in GLMMs  
169 allow a less descriptive identification of differences in ageing trajectories (Fig. S1)  
170 and both approaches gave consistent conclusions (see results section). We identified  
171 the best fitting models using the model selection approach based on the second  
172 order Akaike Information Criterion (AICc) as implemented in the package ‘`MuMIn`’ (v.  
173 1.43.17, Bartoń, 2021). In brief, the best fitting model has the lowest AICc value, with  
174 other models within 4  $\Delta$ AICc being plausible and models becoming increasingly  
175 equivocal up to 14  $\Delta$ AICc, after which they become implausible (Burnham et al.,  
176 2011). Visual inspection of model residuals confirmed that these fulfilled all  
177 assumptions of distribution and homogeneity without any influential data points or  
178 outliers (see above).

179 *Within- vs. between-individual change*

180 In all models, we accounted for non-independence of data due to repeated  
181 measurements from the same individual by including elephant identity ('ID') as a  
182 random intercept. The composition of the population can change with age for  
183 example due to selective disappearance of certain (*e.g.* lighter or heavier) individuals,  
184 which can affect the age trajectory. In order to alleviate as much as possible this  
185 problem in such a long-lived species, we decomposed body mass changes with age  
186 into between- and within-individual changes following the approach developed by van  
187 de Pol & Verhulst, (2006) and van de Pol & Wright, (2009) using two terms: *i*) the age  
188 at last measurement for each individual, which captures the between-individual  
189 variations and *ii*) a ' $\Delta$ age' term (age at measurement minus the individual's mean age  
190 for all measurements) capturing the within-individual changes with age. We mean-  
191 centered and standardised ' $\Delta$ age' so that *i*) individuals measured once all get a  $\Delta$ age  
192 = 0 and hence contribute to the variance of the  $\Delta$ age intercept but not to its slope and  
193 *ii*) to avoid collinearity and to have comparable variance for  $\Delta$ age and  $\Delta$ age<sup>2</sup> (Bolker,  
194 2008; Zuur et al., 2009). Among the 493 individuals of our dataset, 105 individuals  
195 had only one measurement. We included these individuals by giving them  $\Delta$ age = 0  
196 (*i.e.* mean-centered) so they do not contribute to the coefficient but do contribute to  
197 the variance along the Y axis on  $\Delta$ age = 0, diminishing the likelihood of a false  
198 positive, and *ii*) do contribute to the coefficient of the age at last measurement term,  
199 thereby avoiding a bias in the dataset from selecting only the longer-lived or most  
200 monitored individuals.

### 201 *Testing ageing trajectories*

202 We tested several within-individual ageing trajectories, first using GAMMs,  
203 which can provide curvilinear relationships and allow to describe trends, and using  
204 GLMMs, able to detect breaking points if necessary, by testing linear, quadratic,



205 threshold and terminal models (Fig. S1) and we selected the ageing trajectory with  
206 the lowest AICc. For GAMMs, we identified the age at which maxima occurred based  
207 on the first-order derivative ( $= 0$ ) using the function 'fderiv' of the package 'gratia' (v.  
208 0.6.0, Simpson & Singmann, 2021). For threshold models (Fig. S1C), we followed the  
209 approaches previously developed in Briga et al., (2019) and Douhard et al., (2017).  
210 In brief, we first identified the best-fitting threshold age in a series of models, varying  
211 the threshold in the ' $\Delta$ age' term between -35 to 22 years with intervals of one  $\Delta$ age (1  
212 mean-centered  $\Delta$ age = 4.4 and 4.5 years for males and females respectively) and  
213 estimated the threshold and its confidence intervals using  $\pm 4 \Delta$ AIC age range. Then  
214 we compared the best-fitting threshold model with the other ageing trajectories.  
215 Sometimes, declines in trait value appear shortly before death (terminal decline). We  
216 coded a 'terminal' change (Fig. S1D) as a binomial factor for whether an individual  
217 died during the year following the measurement. We used a one-year-window to  
218 avoid a possible seasonal covariation in weight and because it was the best fitting  
219 time-window, but note that models with other time-windows gave consistent  
220 conclusions (Fig. S3).

### 221 *Accounting for temporal and spatial variation in body mass*

222 As body mass variation can be influenced by seasonal, spatial and within-  
223 individual factors, we tested whether body mass values were affected by (i)  
224 measured or estimated, (ii) individuals were alive or dead, (iii) captive- or wild-born  
225 and (iv) the measurement season. To this end we used a model selection approach,  
226 performing a dredge on the best-fitting ageing trajectories for each sex to test for  
227 confounding factors (Table S3). In our models, we included as random intercepts  
228 individual identity to account for the repeated measurement of the same individual.  
229 We also included 'township' to account for the spatial clustering of individuals across

230 Myanmar, although actually adding township worsened the model fit in most cases  
231 (male GAMM:  $\Delta AICc = +1.5$ , GLMM:  $\Delta AICc = +1.8$ ; female GAMM:  $\Delta AICc = +0.6$ ,  
232 GLMM:  $\Delta AICc = -21.2$ ).

## 233 **Results**

234 At the measurements' starting age of 18 years, males were on average 235 kg  
235 heavier than females, weighing respectively 2,541 kg [95%CI: 2,406; 2,683] and  
236 2,306 kg [95%CI: 2,258; 2,355] and this difference was statistically significant ( $\Delta AICc$   
237 = -122.6 in a GLMM with vs without sex as a fixed effect).

238 We identified the elephant's body mass ageing trajectories using general additive  
239 mixed models (GAMMs) and general linear mixed models (GLMMs) and both  
240 approaches gave consistent results. Both analyses showed that sexes have different  
241 body mass ageing trajectories (interaction term, GAMM:  $\Delta AICc = -65.7$ , Fig. S4,  
242 Table S2; GLMM:  $\Delta AICc = -47.0$ , Fig. 1, Table S2) and hence, we identified the  
243 ageing trajectories for both sexes separately.

244 For males, both GAMMs and GLMMs indicated a body mass gain from age 18 years  
245 until their late-forties or early fifties (GAMM maximum: 54 years [95%CI: 53; 56], Fig.  
246 S5; GLMM maximum: 48.2 years [4 AICc CI: 47.1; 51.6], Fig. 1A), followed by a  
247 decline until death (Fig. S4A, Fig. 1A, Table 1, Table S4). In GLMMs, this maximum  
248 was shown through the best fit of a threshold model ( $\Delta AICc = -30.4$  compared to a  
249 linear trajectory): males gained mass at a rate of 22 kg/year [95%CI: 19.4 23.7] or 1%  
250 [95%CI: 0.9; 1.1] of males' mean body mass and then lost mass at a rate of 29  
251 kg/year [95%CI: 14.9; 41.9] or 1.3% [95%CI: 0.7; 1.9] of males' mean body mass  
252 (Fig. 1A, Table 2). Regarding the decline, neither GAMMs nor GLMMs showed

253 confident statistical support that it was terminal (*i.e.* determined by time before death  
254 rather than age): in GAMMs, models with and without the terminal term were almost  
255 equivalent ( $\Delta\text{AICc} = -0.01$ , Table S4) and in GLMMs adding a terminal term  
256 worsened the model fit ( $\Delta\text{AICc} = +5.0$ , Table 1, Fig. S3A).

257 For females, both GAMMs and GLMMs indicated a body mass gain throughout their  
258 lives until a terminal decline during their last year of life (Fig. S4B, Fig. 1B, Table 1,  
259 Table S4). GLMMs indicated a mass gain of 9 kg/year [95%CI: 7.5; 10.4] or 0.35%  
260 [95%CI: 0.3; 0.4] of females' mean body mass ( $\Delta\text{AICc} = -6.7$ , Table 1, Table 2). Loss  
261 of body mass occurred in the last year of life (GAMM:  $\Delta\text{AICc} = -12.2$ , Table S4, Fig.  
262 S4B; GLMM:  $\Delta\text{AICc} = -4.9$ , Table 1, Fig. 1B, Fig. S3B) and consisted of 173 kg  
263 [95%CI: 80; 263] or 6.8% [95%CI: 3.2; 10.4] of their mean body mass (Table 2). For  
264 comparison, the extent of the terminal decline in males, if any, is just over half that in  
265 females at 96 kg [95%CI: -19; 205] or 4.3% [95%CI: -0.9; 9.2] of males' mean body  
266 mass (quantified in the aforementioned best-fitting threshold model). Note that for  
267 females and for both GAMMs and GLMMs, the second best model confirms the linear  
268 age trajectory, but excludes the terminal effect (GAMM:  $\Delta\text{AICc} = +12.2$ , Table S4;  
269 GLMM:  $\Delta\text{AICc} = +4.9$ , Table 1). For males, the second best model (for GAMMs and  
270 GLMMs) conserves the same threshold trajectory, but includes the terminal effect  
271 (GAMM:  $\Delta\text{AICc} = -0.01$ , Table S4; GLMM:  $\Delta\text{AICc} = +5.0$ , Table 1, Fig. S3B). Model  
272 averaging on ageing trajectories within 7  $\Delta\text{AICc}$  (Burnham et al., 2011) confirmed the  
273 ageing trajectories found, *i.e.* a threshold trajectories for males with a significant  
274 decline of body mass from 48 years old onwards (GLMM:  $\beta = -0.06$  [95%CI: -0.09; -  
275 0.03]) and a non-significant terminal decline (GLMM:  $\beta = -0.04$  [95%CI: -0.10; 0.01],  
276 GAMM:  $\beta = -0.04$  [95%CI: -0.09; 0.01]). Similarly, model averaging performed on  
277 models within 7  $\Delta\text{AICc}$  for females confirmed the ageing trajectory found, *i.e.* a body

278 mass gain throughout life (GLMM:  $\beta = 0.015$  [95%CI: 0.01; 0.02]) with no significant  
279 decline before the last year of life (GLMM:  $\beta = -0.07$  [95%CI: -0.11; -0.03]). Also, we  
280 found no effect of none of the temporal and spatial confounding variables tested  
281 (Table S3).

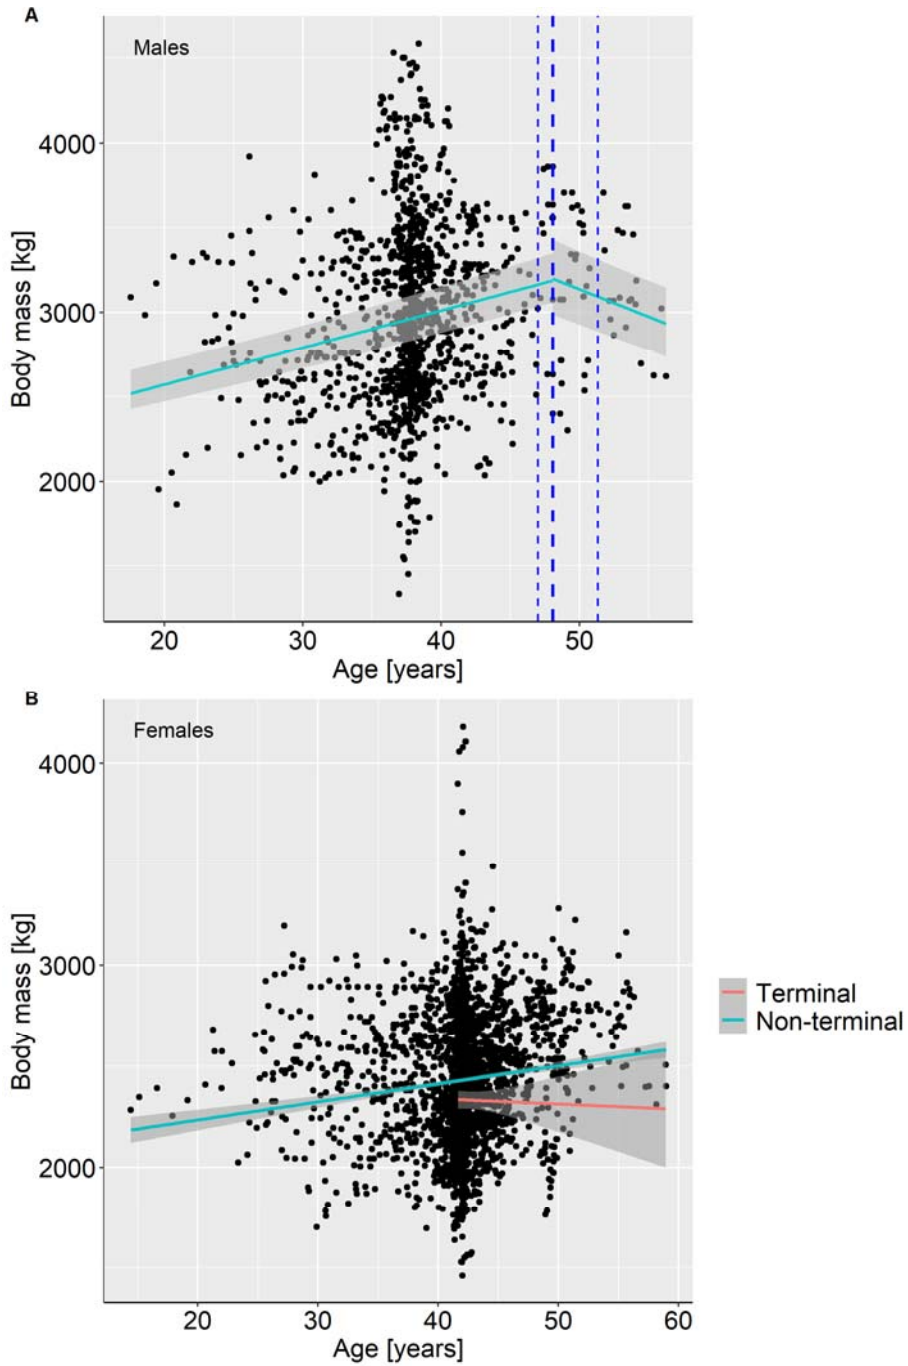

282

283 **Figure 1.** Body mass ageing trajectories of (A) males (n = 1,316 measurements on  
284 171 individuals) and (B) females (n = 2,570 measurements on 322 individuals) with  
285 predictions of the best-fitting GLMMs (Table 1) with grey areas 95%CI. For males,  
286 the thick dashed-line shows the threshold age at onset of the body mass decline (1.9  
287 or 48.3 years) with thin dashed-lines the 4  $\Delta$ AICc-CI [46.6, 52.3]. For females,  
288 measurements in the terminal year (red) are significantly lower (intercept) than  
289 measurements at other ages (blue). Note 1: the terminal slope is for illustration  
290 purposes only and was not statistically tested. Note 2: the original x-axis is  $\Delta$ age, but  
291 for simplicity, we presented here x-axis as age. For the original figure, please see  
292 Fig. S2.

293 **Table 1.** Best fitting body mass ageing trajectories (bold) for males and females, using GLMMs for each model ageing trajectories  
 294 ranked from the least to the most complex. AICc: second-order Akaike Information Criterion;  $\Delta$ AICc: change in AICc relative to the  
 295 best fitting model; k: degrees of freedom.

| Model type                         | Model                                                                                                                | Males      |                 |               | Females    |                 |               |
|------------------------------------|----------------------------------------------------------------------------------------------------------------------|------------|-----------------|---------------|------------|-----------------|---------------|
|                                    |                                                                                                                      | K          | AICc            | $\Delta$ AICc | k          | AICc            | $\Delta$ AICc |
| null                               | $\log(\text{bm}) \sim 1$                                                                                             | 4.0        | -2,828.3        | 364.2         | 4.0        | -5,442.9        | 160.7         |
| linear                             | $\log(\text{bm}) \sim \Delta\text{age} + \text{age-last}$                                                            | 6.0        | -3,162.0        | 30.4          | 6.0        | -5,586.1        | 17.5          |
| +terminal                          | $\log(\text{bm}) \sim \Delta\text{age} + \text{age-last} + \text{terminal}$                                          | 7.0        | -3,156.9        | 35.6          | 7.0        | -5,592.3        | 11.3          |
| age-last <sup>2</sup>              | $\log(\text{bm}) \sim \Delta\text{age} + \text{age-last} + \text{age-last}^2$                                        | 7.0        | -3,155.5        | 37.0          | 7.0        | -5,598.7        | 4.9           |
| <b>+terminal</b>                   | <b><math>\log(\text{bm}) \sim \Delta\text{age} + \text{age-last} + \text{age-last}^2 + \text{terminal}</math></b>    | 8.0        | -3,150.4        | 42.1          | <b>8.0</b> | <b>-5,603.6</b> | <b>0.0</b>    |
| $\Delta\text{age}^2$               | $\log(\text{bm}) \sim \Delta\text{age} + \Delta\text{age}^2 + \text{age-last}$                                       | 7.0        | -3,176.8        | 15.7          | 7.0        | -5,571.6        | 32.0          |
| +terminal                          | $\log(\text{bm}) \sim \Delta\text{age} + \Delta\text{age}^2 + \text{age-last} + \text{terminal}$                     | 8.0        | -3,171.2        | 21.3          | 8.0        | -5,577.9        | 25.7          |
| quadratic                          | $\log(\text{bm}) \sim \Delta\text{age} + \Delta\text{age}^2 + \text{age-last} + \text{age-last}^2$                   | 8.0        | -3,170.1        | 22.3          | 8.0        | -5,584.3        | 19.3          |
| +terminal                          | $\log(\text{bm}) \sim \Delta\text{age} + \Delta\text{age}^2 + \text{age-last} + \text{age-last}^2 + \text{terminal}$ | 9.0        | -3,164.6        | 27.9          | 9.0        | -5,589.3        | 14.3          |
| <b>threshold</b>                   | <b><math>\log(\text{bm}) \sim \Delta\text{age1} + \Delta\text{age2} + \text{age-last}</math></b>                     | <b>8.0</b> | <b>-3,192.5</b> | <b>0.0</b>    | 8.0        | -5,580.5        | 23.1          |
| +terminal                          | $\log(\text{bm}) \sim \Delta\text{age1} + \Delta\text{age2} + \text{age-last} + \text{terminal}$                     | 9.0        | -3,187.5        | 5.0           | 9.0        | -5,586.0        | 17.6          |
| threshold (age-last <sup>2</sup> ) | $\log(\text{bm}) \sim \Delta\text{age1} + \Delta\text{age2} + \text{age-last} + \text{age-last}^2$                   | 9.0        | -3,185.8        | 6.6           | 9.0        | -5,592.6        | 11.0          |
| terminal                           | $\log(\text{bm}) \sim \Delta\text{age1} + \Delta\text{age2} + \text{age-last} + \text{age-last}^2 + \text{terminal}$ | 10.0       | -3,180.9        | 11.6          | 10.0       | -5,596.9        | 6.7           |

296

297 **Table 2.** Parameter estimates of linear mixed-effect models including individual body  
 298 mass beyond 18 years of age as the response variable (in kg, log-transformed) for  
 299 male and female Asian elephants. V: variance, SD: standard-deviation, SE: standard-  
 300 error. Marginal and conditional R<sup>2</sup> give the variance explained by fixed effects, and  
 301 both fixed and random effects, respectively.

| Males                            |          |       | Females                              |          |       |
|----------------------------------|----------|-------|--------------------------------------|----------|-------|
| Random effects                   | V        | SD    | Random effects                       | V        | SD    |
| Individual identity              | 0.019    | 0.137 | Individual identity                  | 0.011    | 0.103 |
| Township                         | 0.0005   | 0.023 | Township                             | 0.003    | 0.056 |
| Fixed effects                    | Estimate | SE    | Fixed effects                        | Estimate | SE    |
| Intercept                        | 7.707    | 0.021 | Intercept                            | 7.840    | 0.019 |
| Age at last measurement          | 0.087    | 0.012 | Age at last measurement              | 0.025    | 0.007 |
| $\Delta$ age1                    | 0.041    | 0.002 | Age at last measurement <sup>2</sup> | -0.028   | 0.006 |
| $\Delta$ age2                    | -0.057   | 0.014 | $\Delta$ age                         | 0.016    | 0.001 |
|                                  |          |       | Terminal (1)                         | -0.071   | 0.020 |
| <b>Marginal R<sup>2</sup></b>    | 0.24     |       | <b>Marginal R<sup>2</sup></b>        | 0.10     |       |
| <b>Conditional R<sup>2</sup></b> | 0.89     |       | <b>Conditional R<sup>2</sup></b>     | 0.77     |       |

302

## 303 Discussion

304 We tested whether in a species with marked male-biased intrasexual competition,  
 305 males showed an earlier and/or faster rate of body mass ageing than females. Both  
 306 sexes gained mass during early adulthood. However, the onset of body mass ageing  
 307 differed between both sexes: males began to lose mass from 48.3 years old  
 308 onwards. In contrast, females lost body mass generally at an older age, namely in  
 309 their last year of life. Compared to a previous study on growth curves of this  
 310 population (Mumby, Chapman, et al., 2015), we are now using a larger dataset,  
 311 including older and more numerous retired individuals. This allowed us to evidence  
 312 body mass ageing in this species, which was not possible until now. Here we discuss

313 the implications of our results in the light of the classical theory of ageing (Williams,  
314 1957) and of the management of Asian elephants.

315 We describe for the first time a sex-specific pattern of body mass ageing in this  
316 species. Body mass ageing is often used in mammals as it may underpin actuarial  
317 and reproductive ageing (Beirne et al., 2015; Bérubé et al., 1999; Nussey et al.,  
318 2011). In our population, sex-specific mortality ageing has been already shown  
319 (Lahdenperä et al., 2018) and males display higher mortality than females at all ages.  
320 However, reproductive ageing has only been described in females of this population  
321 due in part to the difficulty of recording paternity in male elephants (Hayward et al.,  
322 2014; Mumby, Mar, Hayward, et al., 2015; Robinson et al., 2012). Our results provide  
323 valuable insights on how body condition declines with age and offer another aspect  
324 of the multifaceted ageing, often referred to as a mosaic (Walker & Herndon, 2010),  
325 in this long-lived and highly social species.

326 Asian elephants show male-biased intra-sexual competition, with males being more  
327 aggressive (Seltmann et al., 2019), fighting more for dominance and showing higher  
328 rates of mortality at all ages than females, including during early development, as  
329 calves and during adulthood (Lahdenperä et al., 2018). In such species, classical  
330 theory of ageing predicts that males should show an earlier onset or accelerated  
331 ageing (Williams, 1957). Indeed, in several polygynous mammals, males display  
332 earlier onset or higher rates of ageing than females, suggested to be due to their  
333 stronger intrasexual competition (Clutton-Brock & Isvaran, 2007 but see also Camus  
334 et al., 2012; Tower, 2006). For example, in European badgers (*Meles meles*, Beirne  
335 et al., 2015) and Soay sheep (*Ovis aries*, Hayward et al., 2015), males systematically  
336 showed stronger or earlier body mass ageing compared to females. Conversely, in  
337 monogamous species, males and females' onsets and rates of ageing tend to be



338 similar (Bronikowski et al., 2011; Clutton-Brock & Isvaran, 2007; Thorley et al., 2020).  
339 Our results are consistent with those studies and with the prediction of the classical  
340 theory of ageing. Moreover, our results are inconsistent with later alternatives that  
341 suggest that the prediction of the classical theory of ageing can be disrupted by high  
342 early-life condition-dependent mortality in males (Chen & Maklakov, 2014) or by  
343 canalisation (Flatt, 2005).

344 However, as mentioned above, previous work on this population showed both  
345 reproductive and survival age-related decline in females (Hayward et al., 2014;  
346 Robinson et al., 2012). Hence, the ageing trajectories do not synchronise between  
347 traits in females. Empirically, this heterogeneity of ageing patterns is more the rule  
348 than the exception as found in other species (Briga & Verhulst, 2021; Hayward et al.,  
349 2015; Walker & Herndon, 2010). In our population, this mismatch can be explained  
350 by the fact that body mass is a poor predictor of reproductive success, number of  
351 offspring produced or raised up to independence (5 years old), and that no  
352 relationship between height and survival has been found in females (Crawley et al.,  
353 2017). Our results that females do not show age-dependent body mass decline  
354 combined with previous results are at odds with study on other vertebrates. Asian  
355 elephants reproduce all year long (Brown, 2014), despite living in a seasonal  
356 environment, meaning that females finance reproduction through energy stored  
357 before reproduction. This is contrary to, say roe deer (*Capreolus capreolus*), an  
358 income breeder financing reproduction concurrently to gestation as this ungulate  
359 does not store reserves (Andersen et al., 2000). In the latter case, reproductive  
360 success therefore depends on body condition and available resources, while in the  
361 former case, elephants reproduce when they have stored sufficient resources to  
362 finance gestation. This might in part explain the absence of relation between female

363 body mass ageing and reproductive senescence, contrary to males, benefiting more  
364 from being heavy than females during intrasexual competition (Sukumar, 2003).

365 Our study is subject to a number of limitations when it comes down to identifying why  
366 the sexes may differ in their ageing trajectories. First, it is possible that male  
367 elephants in our timber elephant population are used more for tasks requiring  
368 strength or tusks, thereby causing an earlier onset of body mass declines in males  
369 than in females. However, both sexes fall under the same government-set workload,  
370 care and retirement regulation, except for females' maternity leave. One substantial  
371 difference between sexes is that parental care is concentrated on females, with for  
372 example only females being given 'parental leave' following reproduction (Toke Gale,  
373 1974). However, since maternity is energetically expensive and no more favourable  
374 than timber working, this is unlikely to lead to the delayed onset of body mass  
375 declines in females. An ideal test would be to analyse the effect of timber work and  
376 maternity leave on body mass dynamics.

377 Second, elephants have a specific dentition that consists of molar teeth that  
378 eventually wear down at the end of their lives, and pathologic malocclusions or lack  
379 of molars can lead to weight loss and death by starvation. In sexually dimorphic  
380 species of ungulates, males generally display smaller molar teeth size compared to  
381 females, relatively to body size. This results in teeth wearing down faster and  
382 depleting earlier for males than females (Carranza & Pérez-Barbería, 2007) with  
383 potential consequences on male senescence compared to females. In Asian  
384 elephants, although both sexes have the same molar dental anatomy, it is possible  
385 that the earlier onset of body mass declines in males reflects sex-specific differences  
386 in tooth wear. Indeed, in captive species, dental problems have been described well

387 before the last year of life (Gaillard et al., 2015) and, if there is sex-specific tooth  
388 wear, this could be associated with the earlier onset of body mass ageing in males.

389 Third, male elephants have recurring periods of physiological “musth” throughout  
390 their adult lives, which can temporarily but profoundly impact the body mass of  
391 individual males (Eisenberg et al., 1971) thereby affecting the body mass ageing  
392 trajectory. Unfortunately, recording morphological measurements is difficult during  
393 the musth period during which males display highly aggressive behaviours, although  
394 accounting for musth would improve future analyses.

395 Fourth, in our study, we did not find any evidence for body mass-based selective  
396 disappearance, but, as it is often the case in long-lived species, the average  
397 longitudinal individual monitoring is short relative to the lifespan of this species (e.g.  
398 Global BMI Mortality Collaboration et al., 2016; Prospective Studies Collaboration,  
399 2009), and hence we only have limited power to detect such association. It is  
400 possible that there are sex-specific dynamics of selective disappearance, but whether  
401 that is the case in Asian elephants remains to be shown. An analysis with more  
402 longitudinal data would be useful to tackle this question.

403 Fifth, for both sexes, it is possible that maximum body mass is set by physiological  
404 and ecological constraints as indicated by the weight growth curves found earlier in  
405 this population (Mumby, Chapman, et al., 2015). These constraints could be to some  
406 extent sex-specific, although at this point, we can only speculate as to why these  
407 constraints may drive sex-specific ageing trajectory. Finally, we found a maximum  
408 body mass in males but not in females. This sex-specific differences could be driven  
409 by the fact that male elephants benefit more than females from being heavy during  
410 intrasexual competition (Sukumar, 2003).

411 Another factor to take into account is that retirement occurs at around 50 years in  
412 both sexes, which likely diminishes physical exercise and allows more time for  
413 foraging, thereby continuing the weight gain. The reduced intrasexual competition in  
414 females relative to males, together with this retirement, could lead to the continued  
415 mass gain of females. One way of disentangling the effect of senescence and  
416 retirement on body mass trajectories would be to know whether muscle is lost over  
417 fat. Unfortunately, we do not have the data to know this. However, it seems that  
418 muscle function does not decrease with age in this semi-captive population in neither  
419 sex (Reichert et al., 2022). On the contrary, fat storage as measured by levels of  
420 circulating triglycerides remained constant up to adulthood, decreasing afterwards in  
421 senior elephants (from retirement onwards) in both sexes (Reichert et al., 2022).

422 Also, all elephants officially retire at age 55, but most elephants enter pre-retirement  
423 around the age of 50 because of decreased strength. These results, taken together  
424 with the onset of body mass decline we found in males (*i.e.* 48 years old), suggest  
425 that retired individuals lose fat in both sex rather than muscle and that body mass  
426 ageing is rather a cause than a consequence of retirement in males. Nevertheless,  
427 given that elephants in the wild do not experience timber labour and retirement, we  
428 cannot exclude that the sex-specific body mass ageing trajectories could be different  
429 in a wild (non-working) population of Asian elephants compared to those found in our  
430 study.

431 We found that females experienced a terminal body mass decline in the last year of  
432 life. Our data contain both males and females among the oldest ages (>50), hence  
433 sex-specific terminal decline is unlikely to emerge from differences in lifespan. In  
434 European badgers, a species in which females outlive males, both sexes displayed  
435 terminal body mass declines (Beirne et al., 2015). It is possible that the sex-specific

436 terminal declines in our study resulted from differences in power, with 5 dead males  
437 and 18 dead females. Indeed, for both males and females, the coefficient and effect  
438 size of the terminal terms were negative, but the effect size in males remained about  
439 half of that in females (Cohen's  $d_{\text{males}} = -0.045$  [95%CI: -0.10; 0.01] = a decline of 96 kg  
440 [95%CI: -19; 205], Cohen's  $d_{\text{females}} = -0.071$  [95%CI: -0.11; -0.03] = a decline of 173 kg  
441 [95%CI: 80; 263]). Hence, it is possible that the sex-specific terminal effect is driven  
442 by power issues and we look forward to testing that with several more years of  
443 monitoring.

444 Terminal declines emphasise that the chronological age is rarely a perfect estimation  
445 of the biological age which can better describe the 'true biological state' of an  
446 organism (Klemera & Doubal, 2006). In that sense, terminal decline is a biomarker of  
447 health and remaining lifespan. The 'terminal illness' hypothesis refers to the age-  
448 independent decrease of a trait value, related to the imminent death of the individual  
449 (Coulson & Fairweather, 2001). Such terminal effects were shown for example for  
450 body mass in mammals (stronger in males than females in European badgers  
451 (Beirne et al., 2015), in both sexes in Soay sheep (Hayward et al., 2015) and in male  
452 but not female Alpine marmots (Tafari et al., 2013)) and for sexual signals in birds  
453 (Simons et al., 2016). For which traits or under which conditions to expect terminal  
454 declines remains yet poorly understood but our study highlights the importance of  
455 studying sex-specific differences in ageing and illustrates the need to improve our  
456 understanding of the mechanisms driving the diversity of ageing patterns in the wild.

## 457 **Acknowledgements**

458 We thank the Myanmar Timber Enterprise (MTE) and the Myanmar Ministry of Natural  
459 Resources and Environmental Conservation for their collaboration and all of the MTE  
460 staff enabling this study by recording elephant life events and morphology for so  
461 long. Particularly, we thank Mu Mu Thein and Nina Aro for their patience in helping

462 translating countless elephant morphological measurements from burmese to  
463 english. We also thank Carly Lynsdale for ensuring our english was fluent. We thank  
464 *the Academy of Finland, the European Research Council and the Ella & Georg*  
465 *Ehrnrooth Foundation for fundings.*

## 466 **Ethics**

467 The study was performed with the permission from the Myanmar Ministry of Natural  
468 Resources and Environmental Conservation and following the University of Turku  
469 ethical guidelines.

## 470 **Conflict of interest**

471 The authors have no conflict of interest to declare.

## 472 **Funding**

473 *This work was supported by the Academy of Finland [292368], the European*  
474 *Research Council [ERC-2014-CoG 648766] and the Ella & Georg Ehrnrooth*  
475 *Foundation.*

## 476 **Authors' contribution**

477 HHA, WH and UKN performed field work and data collection. VL, VB and MB  
478 designed the study and LL selected, extracted and translated data. LL carried out all  
479 statistical analyses with contributions from VB and MB. LL wrote the manuscript and  
480 all authors critically reviewed it. All authors approved the manuscript for publication  
481 and agree to be held accountable for the content therein and approve the final  
482 version of the manuscript.

## 483 **Data accessibility**

484 The datasets and codes supporting the conclusions of this article have been  
485 uploaded on Dryad digital repository and will be made publicly available upon  
486 acceptance.

## 487 **References**

- 488 Andersen, R., Gaillard, J.-M., Linnell, J. D. C., & Duncan, P. (2000). Factors affecting maternal care in  
489 an income breeder, the European roe deer. *Journal of Animal Ecology*, 69(4), 672–682.
- 490 Bartoń, K. (2021). *MuMIn*: Multi-Model Inference (1.43.17) [Computer software]. [https://CRAN.R-](https://CRAN.R-project.org/package=MuMIn)  
491 [project.org/package=MuMIn](https://CRAN.R-project.org/package=MuMIn)
- 492 Bates, D., Mächler, M., Bolker, B., & Walker, S. (2015). Fitting linear mixed-effects models using lme4.  
493 *Journal of Statistical Software*, 67(1), 1–48. <https://doi.org/10.18637/jss.v067.i01>
- 494 Beirne, C., Delahay, R., & Young, A. (2015). Sex differences in senescence: The role of intra-sexual  
495 competition in early adulthood. *Proceedings of the Royal Society B: Biological Sciences*, 282(1811),  
496 20151086. <https://doi.org/10.1098/rspb.2015.1086>

- 497 Bérubé, C. H., Festa-Bianchet, M., & Jorgenson, J. T. (1999). Individual Differences, Longevity, and  
498 Reproductive Senescence in Bighorn Ewes. *Ecology*, *80*(8), 2555–2565.  
499 <https://doi.org/10.2307/177240>
- 500 Bolker, B. M. (2008). *Ecological Models and Data in R*. Princeton University Press.  
501 <https://press.princeton.edu/books/hardcover/9780691125220/ecological-models-and-data-in-r>
- 502 Bonduriansky, R., Maklakov, A., Zajitschek, F., & Brooks, R. (2008). Sexual selection, sexual conflict  
503 and the evolution of ageing and life span. *Functional Ecology*, *22*(3), 443–453.  
504 <https://doi.org/10.1111/j.1365-2435.2008.01417.x>
- 505 Briga, M., Jimeno, B., & Verhulst, S. (2019). Coupling lifespan and aging? The age at onset of body  
506 mass decline associates positively with sex-specific lifespan but negatively with environment-specific  
507 lifespan. *Experimental Gerontology*, *119*, 111–119. <https://doi.org/10.1016/j.exger.2019.01.030>
- 508 Briga, M., & Verhulst, S. (2021). Mosaic metabolic ageing: Basal and standard metabolic rate age in  
509 opposite directions and independent of environmental quality, sex and lifespan in a passerine.  
510 *Functional Ecology*, *35*. <https://doi.org/10.1111/1365-2435.13785>
- 511 Bronikowski, A. M., Altmann, J., Brockman, D. K., Cords, M., Fedigan, L. M., Pusey, A., Stoinski, T.,  
512 Morris, W. F., Strier, K. B., & Alberts, S. C. (2011). Aging in the Natural World: Comparative Data  
513 Reveal Similar Mortality Patterns Across Primates. *Science (New York, N.y.)*, *331*(6022), 1325–1328.  
514 <https://doi.org/10.1126/science.1201571>
- 515 Brown, J. L. (2014). Comparative reproductive biology of elephants. *Advances in Experimental*  
516 *Medicine and Biology*, *753*, 135–169. [https://doi.org/10.1007/978-1-4939-0820-2\\_8](https://doi.org/10.1007/978-1-4939-0820-2_8)
- 517 Burnham, K. P., Anderson, D. R., & Huyvaert, K. P. (2011). AIC model selection and multimodel  
518 inference in behavioral ecology: Some background, observations, and comparisons. *Behavioral*  
519 *Ecology and Sociobiology*, *65*(1), 23–35. <https://doi.org/10.1007/s00265-010-1029-6>
- 520 Camus, M. F., Clancy, D. J., & Dowling, D. K. (2012). Mitochondria, maternal inheritance, and male  
521 aging. *Current Biology: CB*, *22*(18), 1717–1721. <https://doi.org/10.1016/j.cub.2012.07.018>
- 522 Carranza, J., & Pérez-Barbería, F. J. (2007). Sexual selection and senescence: Male size-dimorphic  
523 ungulates evolved relatively smaller molars than females. *The American Naturalist*, *170*(3), 370–380.  
524 <https://doi.org/10.1086/519852>
- 525 Chen, H., & Maklakov, A. A. (2014). Condition Dependence of Male Mortality Drives the Evolution of  
526 Sex Differences in Longevity. *Current Biology*, *24*(20), 2423–2427.  
527 <https://doi.org/10.1016/j.cub.2014.08.055>
- 528 Clutton-Brock, T. H., & Isvaran, K. (2007). Sex differences in ageing in natural populations of  
529 vertebrates. *Proceedings of the Royal Society B: Biological Sciences*, *274*(1629), 3097–3104.  
530 <https://doi.org/10.1098/rspb.2007.1138>
- 531 Coulson, J. C., & Fairweather, J. A. (2001). Reduced reproductive performance prior to death in the  
532 Black-legged Kittiwake: Senescence or terminal illness? *Journal of Avian Biology*, *32*(2), 146–152.  
533 <https://doi.org/10.1034/j.1600-048X.2001.320207.x>
- 534 Crawley, J. a. H., Mumby, H. S., Chapman, S. N., Lahdenperä, M., Mar, K. U., Htut, W., Soe, A. T.,  
535 Aung, H. H., & Lummaa, V. (2017). Is bigger better? The relationship between size and reproduction  
536 in female Asian elephants. *Journal of Evolutionary Biology*, *30*(10), 1836–1845.  
537 <https://doi.org/10.1111/jeb.13143>

- 538 Douhard, F., Gaillard, J.-M., Pellerin, M., Jacob, L., & Lemaître, J.-F. (2017). The cost of growing  
539 large: Costs of post-weaning growth on body mass senescence in a wild mammal. *Oikos*, *126*(9),  
540 1329–1338. <https://doi.org/10.1111/oik.04421>
- 541 Eisenberg, J. F., McKay, G. M., & Jainudeen, M. R. (1971). Reproductive behavior of the Asiatic  
542 elephant (*Elephas maximus maximus* L.). *Behaviour*, *38*(3), 193–225.  
543 <https://doi.org/10.1163/156853971x00087>
- 544 Flatt, T. (2005). The evolutionary genetics of canalization. *The Quarterly Review of Biology*, *80*(3),  
545 287–316. <https://doi.org/10.1086/432265>
- 546 Gaillard, J.-M., Berger, V., Tidière, M., Duncan, P., & Lemaître, J.-F. (2015). Does tooth wear influence  
547 ageing? A comparative study across large herbivores. *Experimental Gerontology*, *71*, 48–55.  
548 <https://doi.org/10.1016/j.exger.2015.09.008>
- 549 Gaillard, J.-M., Festa-Bianchet, M., Delorme, D., & Jorgenson, J. (2000). Body mass and individual  
550 fitness in female ungulates: Bigger is not always better. *Proceedings of the Royal Society of London.*  
551 *Series B: Biological Sciences*, *267*(1442), 471–477. <https://doi.org/10.1098/rspb.2000.1024>
- 552 Global BMI Mortality Collaboration, Di Angelantonio, E., Bhupathiraju, S., Wormser, D., Gao, P.,  
553 Kaptoge, S., Berrington de Gonzalez, A., Cairns, B., Huxley, R., Jackson, C., Joshy, G., Lewington, S.,  
554 Manson, J., Murphy, N., Patel, A., Samet, J., Woodward, M., Zheng, W., Zhou, M., ... Hu, F. (2016).  
555 Body-mass index and all-cause mortality: Individual-participant-data meta-analysis of 239  
556 prospective studies in four continents. *The Lancet*, *388*(10046), 776–786.  
557 [https://doi.org/10.1016/S0140-6736\(16\)30175-1](https://doi.org/10.1016/S0140-6736(16)30175-1)
- 558 Hämäläinen, A., Dammhahn, M., Aujard, F., Eberle, M., Hardy, I., Kappeler, P. M., Perret, M.,  
559 Schliehe-Diecks, S., & Kraus, C. (2014). Senescence or selective disappearance? Age trajectories of  
560 body mass in wild and captive populations of a small-bodied primate. *Proceedings of the Royal*  
561 *Society B: Biological Sciences*, *281*(1791), 20140830. <https://doi.org/10.1098/rspb.2014.0830>
- 562 Hayward, A. D., Mar, K. U., Lahdenperä, M., & Lummaa, V. (2014). Early reproductive investment,  
563 senescence and lifetime reproductive success in female Asian elephants. *Journal of Evolutionary*  
564 *Biology*, *27*(4), 772–783. <https://doi.org/10.1111/jeb.12350>
- 565 Hayward, A. D., Moorad, J., Regan, C. E., Berenos, C., Pilkington, J. G., Pemberton, J. M., & Nussey, D.  
566 H. (2015). Asynchrony of senescence among phenotypic traits in a wild mammal population.  
567 *Experimental Gerontology*, *71*, 56–68. <https://doi.org/10.1016/j.exger.2015.08.003>
- 568 Jones, O. R., Scheuerlein, A., Salguero-Gómez, R., Camarda, C. G., Schaible, R., Casper, B. B., Dahlgren,  
569 J. P., Ehrlén, J., García, M. B., Menges, E. S., Quintana-Ascencio, P. F., Caswell, H., Baudisch, A., &  
570 Vaupel, J. W. (2014). Diversity of ageing across the tree of life. *Nature*, *505*(7482), 169–173.  
571 <https://doi.org/10.1038/nature12789>
- 572 Klemnera, P., & Doubal, S. (2006). A new approach to the concept and computation of biological age.  
573 *Mechanisms of Ageing and Development*, *127*(3), 240–248.  
574 <https://doi.org/10.1016/j.mad.2005.10.004>
- 575 Lahdenperä, M., Mar, K. U., Courtiol, A., & Lummaa, V. (2018). Differences in age-specific mortality  
576 between wild-caught and captive-born Asian elephants. *Nature Communications*, *9*(1), 3023.  
577 <https://doi.org/10.1038/s41467-018-05515-8>



- 578 Lahdenperä, M., Mar, K. U., & Lummaa, V. (2016). Nearby grandmother enhances calf survival and  
579 reproduction in Asian elephants. *Scientific Reports*, 6(1), 27213. <https://doi.org/10.1038/srep27213>
- 580 Leimgruber, P., Senior, B., Aung, M., Songer, M., Mueller, T., Wemmer, C., & Ballou, J. (2008).  
581 Modeling population viability of captive elephants in Myanmar (Burma): Implications for wild  
582 populations. *Animal Conservation*, 11, 198–205. <https://doi.org/10.1111/j.1469-1795.2008.00172.x>
- 583 Lemaître, J.-F., Ronget, V., Tidière, M., Allainé, D., Berger, V., Cohas, A., Colchero, F., Conde, D. A.,  
584 Garratt, M., Liker, A., Marais, G. A. B., Scheuerlein, A., Székely, T., & Gaillard, J.-M. (2020). Sex  
585 differences in adult lifespan and aging rates of mortality across wild mammals. *Proceedings of the*  
586 *National Academy of Sciences*, 117(15), 8546–8553. <https://doi.org/10.1073/pnas.1911999117>
- 587 Lynch, E. C., Lummaa, V., Htut, W., & Lahdenperä, M. (2019). Evolutionary significance of maternal  
588 kinship in a long-lived mammal. *Philosophical Transactions of the Royal Society B: Biological Sciences*,  
589 374(1780), 20180067. <https://doi.org/10.1098/rstb.2018.0067>
- 590 Maklakov, A. A., & Lummaa, V. (2013). Evolution of sex differences in lifespan and aging: Causes and  
591 constraints. *BioEssays*, 35, 717–724. <https://doi.org/10.1002/bies.201300021>
- 592 Monaghan, P., Charmantier, A., Nussey, D. H., & Ricklefs, R. E. (2008). The evolutionary ecology of  
593 senescence. *Functional Ecology*, 22(3), 371–378. <https://doi.org/10.1111/j.1365-2435.2008.01418.x>
- 594 Mumby, H. S., Chapman, S. N., Crawley, J. A. H., Mar, K. U., Htut, W., Thura Soe, A., Aung, H. H., &  
595 Lummaa, V. (2015). Distinguishing between determinate and indeterminate growth in a long-lived  
596 mammal. *BMC Evolutionary Biology*, 15(1), 214. <https://doi.org/10.1186/s12862-015-0487-x>
- 597 Mumby, H. S., Mar, K. U., Hayward, A. D., Htut, W., Htut-Aung, Y., & Lummaa, V. (2015). Elephants  
598 born in the high stress season have faster reproductive ageing. *Scientific Reports*, 5(1), 13946.  
599 <https://doi.org/10.1038/srep13946>
- 600 Mumby, H. S., Mar, K. U., Thitaram, C., Courtiol, A., Towiboon, P., Min-Oo, Z., Htut-Aung, Y., Brown, J.  
601 L., & Lummaa, V. (2015). Stress and body condition are associated with climate and demography in  
602 Asian elephants. *Conservation Physiology*, 3(1), cov030. <https://doi.org/10.1093/conphys/cov030>
- 603 Nussey, D. H., Coulson, T., Delorme, D., Clutton-Brock, T. H., Pemberton, J. M., Festa-Bianchet, M., &  
604 Gaillard, J.-M. (2011). Patterns of body mass senescence and selective disappearance differ among  
605 three species of free-living ungulates. *Ecology*, 92(10), 1936–1947. JSTOR.  
606 <https://doi.org/10.1890/11-0308.1>
- 607 Nussey, D. H., Kruuk, L., Morris, A., Clements, M., Pemberton, J., & Clutton-Brock, T. (2009). Inter-  
608 and Intrasexual Variation in Aging Patterns across Reproductive Traits in a Wild Red Deer Population.  
609 *The American Naturalist*, 174, 342–357. <https://doi.org/10.1086/603615>
- 610 Oo, Z. M. (2010). The training methods used in Myanma Timber Enterprise. *Gajah*, 33, 58–61.
- 611 Pelletier, F., Clutton-Brock, T., Pemberton, J., Tuljapurkar, S., & Coulson, T. (2007). The Evolutionary  
612 Demography of Ecological Change: Linking Trait Variation and Population Growth. *Science*,  
613 315(5818), 1571–1574. <https://doi.org/10.1126/science.1139024>
- 614 Prospective Studies Collaboration. (2009). Body-mass index and cause-specific mortality in 900 000  
615 adults: Collaborative analyses of 57 prospective studies. *The Lancet*, 373(9669), 1083–1096.  
616 [https://doi.org/10.1016/S0140-6736\(09\)60318-4](https://doi.org/10.1016/S0140-6736(09)60318-4)

- 617 R Core Team. (2021). *R: A language and environment for statistical computing*. R Foundation for  
618 Statistical Computing. <https://www.R-project.org>
- 619 Rando, T. A., & Wyss-Coray, T. (2021). Asynchronous, contagious and digital aging. *Nature Aging*,  
620 1(1), 29–35. <https://doi.org/10.1038/s43587-020-00015-1>
- 621 Reichert, S., Berger, V., dos Santos, D. J. F., Lahdenperä, M., Nyein, U. K., Htut, W., & Lummaa, V.  
622 (2022). Age related variation of health markers in Asian elephants. *Experimental Gerontology*, 157,  
623 111629. <https://doi.org/10.1016/j.exger.2021.111629>
- 624 Robinson, M. R., Mar, K. U., & Lummaa, V. (2012). Senescence and age-specific trade-offs between  
625 reproduction and survival in female Asian elephants: Age-specific reproduction and survival. *Ecology*  
626 *Letters*, 15(3), 260–266. <https://doi.org/10.1111/j.1461-0248.2011.01735.x>
- 627 Seltmann, M. W., Helle, S., Htut, W., & Lahdenperä, M. (2019). Males have more aggressive and less  
628 sociable personalities than females in semi-captive Asian elephants. *Scientific Reports*, 9(1), 2668.  
629 <https://doi.org/10.1038/s41598-019-39915-7>
- 630 Simons, M. J. P., Briga, M., & Verhulst, S. (2016). Stabilizing survival selection on presenescent  
631 expression of a sexual ornament followed by a terminal decline. *Journal of Evolutionary Biology*,  
632 29(7), 1368–1378. <https://doi.org/10.1111/jeb.12877>
- 633 Simpson, G. L., & Singmann, H. (2021). *gratia*: Graceful 'ggplot'-based graphics and other functions  
634 for GAMs fitted using « mgcv » (0.6.0) [Computer software].
- 635 Sukumar, R. (2003). *The living elephants: Evolutionary ecology, behavior, and conservation*. Oxford  
636 University Press.
- 637 Tafani, M., Cohas, A., Bonenfant, C., Gaillard, J.-M., Lardy, S., & Allainé, D. (2013). Sex-specific  
638 senescence in body mass of a monogamous and monomorphic mammal: The case of Alpine  
639 marmots. *Oecologia*, 172(2), 427–436. <https://doi.org/10.1007/s00442-012-2499-1>
- 640 Thorley, J., Duncan, C., Sharp, S. P., Gaynor, D., Manser, M. B., & Clutton-Brock, T. (2020).  
641 Sex-independent senescence in a cooperatively breeding mammal. *Journal of Animal Ecology*, 89(4),  
642 1080–1093. <https://doi.org/10.1111/1365-2656.13173>
- 643 Tidière, M., Gaillard, J.-M., Müller, D. W. H., Lackey, L. B., Gimenez, O., Clauss, M., & Lemaître, J.-F.  
644 (2015). Does sexual selection shape sex differences in longevity and senescence patterns across  
645 vertebrates? A review and new insights from captive ruminants. *Evolution*, 69(12), 3123–3140.  
646 <https://doi.org/10.1111/evo.12801>
- 647 Toke Gale, U. (1974). *Burmese timber elephant*. Trade Corporation.
- 648 Tower, J. (2006). Sex-specific regulation of aging and apoptosis. *Mechanisms of Ageing and*  
649 *Development*, 127(9), 705–718. <https://doi.org/10.1016/j.mad.2006.05.001>
- 650 van de Pol, M., & Verhulst, S. (2006). Age-dependent traits: A new statistical model to separate  
651 within- and between-individual effects. *The American Naturalist*, 167(5), 766–773.  
652 <https://doi.org/10.1086/503331>
- 653 van de Pol, M., & Wright, J. (2009). A simple method for distinguishing within- versus between-  
654 subject effects using mixed models. *Animal Behaviour*, 77(3), 753–758.  
655 <https://doi.org/10.1016/j.anbehav.2008.11.006>

- 656 Walker, L. C., & Herndon, J. G. (2010). Mosaic aging. *Medical Hypotheses*, *74*(6), 1048–1051.  
657 <https://doi.org/10.1016/j.mehy.2009.12.031>
- 658 Williams, G. C. (1957). Pleiotropy, natural selection, and the evolution of senescence. *Evolution*,  
659 *11*(4), 398–411. <https://doi.org/10.2307/2406060>
- 660 Wood, S. N. (2011). Fast stable restricted maximum likelihood and marginal likelihood estimation of  
661 semiparametric generalized linear models. *Journal of the Royal Statistical Society (B)*, *73*(1), 3–36.  
662 <https://doi.org/10.1111/j.1467-9868.2010.00749.x>
- 663 Zaw, U. K. (1997). Utilization of elephants in timber harvesting in Myanmar. *Gajah*, *17*, 9–22.
- 664 Zuur, A., Ieno, E. N., Walker, N., Saveliev, A. A., & Smith, G. M. (2009). *Mixed Effects Models and*  
665 *Extensions in Ecology with R*. Springer-Verlag. <https://doi.org/10.1007/978-0-387-87458-6>
- 666
